1 **Hyaluronidase-1-mediated glycoalyx impairment underlies endothelial**  
2 **abnormalities in polypoidal choroidal vasculopathy**

3  
4 Kan-Xing Wu<sup>1</sup>, Natalie Jia Ying Yeo<sup>1</sup>, Chun-Yi Ng<sup>1</sup>, Florence Wen Jing Chioh<sup>1</sup>, Fan  
5 Qiao<sup>2,3</sup>, Xianfeng Tian<sup>1,2</sup>, Yang Binxia<sup>10</sup>, Gunaseelan Narayanan<sup>4</sup>, Hui-Min Tay<sup>6</sup>,  
6 Han-Wei Hou<sup>1,6</sup>, N Ray Dunn<sup>1,5,7</sup>, Xinyi Su<sup>8,9,10,11</sup>, Chui Ming Gemmy Cheung<sup>2,9</sup>,  
7 Christine Cheung<sup>1,10,\*</sup>

8  
9 <sup>1</sup>Lee Kong Chian School of Medicine, Nanyang Technological University, Singapore

10 <sup>2</sup>Duke-NUS Medical School, National University of Singapore, Singapore

11  
12 <sup>3</sup>Ophthalmology & Visual Sciences Academic Clinical Program (Eye ACP), Duke-  
13 NUS Medical School, Singapore

14  
15 <sup>4</sup>Institute of Medical Biology, Agency for Science, Technology and Research,  
16 Singapore

17  
18 <sup>5</sup>School of Biological Sciences Nanyang Technological University, Singapore

19  
20 <sup>6</sup>School of Mechanical and Aerospace Engineering, Nanyang Technological  
21 University, Singapore

22  
23 <sup>7</sup>Institute of Medical Biology, Agency for Science Technology and Research,  
24 Singapore

25  
26 <sup>8</sup>Department of Ophthalmology, Yong Loo Lin School of Medicine, National  
27 University of Singapore, Singapore

28  
29 <sup>9</sup>Singapore Eye Research Institute, Singapore

30  
31 <sup>10</sup>Institute of Molecular and Cell Biology, Agency for Science, Technology and  
32 Research, Singapore

33  
34 <sup>11</sup>Department of Ophthalmology, National University Hospital, Singapore

35  
36  
37 \*Correspondence: [ccheung@ntu.edu.sg](mailto:ccheung@ntu.edu.sg)

38  
39  
40  
41  
42  
43  
44  
45  
46  
47  
48

49 **Abstract**

50

51 **Background:** Polypoidal choroidal vasculopathy (PCV), a subtype of age-related

52 macular degeneration (AMD), is characterized by polyp-like dilatation of blood

53 vessels and turbulent blood flow in the choroid of the eye. Gold standard anti-

54 vascular endothelial growth factor (anti-VEGF) therapy often fails to regress

55 polypoidal lesions in patients. Current animal models have also been hampered by

56 their inability to recapitulate such vascular lesions. These underscore the need to

57 identify VEGF-independent pathways in PCV pathogenesis.

58 **Results:** We cultivated blood outgrowth endothelial cells (BOECs) from PCV

59 patients and normal controls to serve as our experimental disease models. When

60 BOECs were exposed to heterogeneous flow, single-cell transcriptomic analysis

61 revealed that PCV BOECs preferentially adopted migratory-angiogenic cell state,

62 while normal BOECs undertook proinflammatory cell state. PCV BOECs also had a

63 repressed protective response to flow stress by demonstrating lower mitochondrial

64 functions. We uncovered that elevated hyaluronidase-1 in PCV BOECs led to

65 increased degradation of hyaluronan, a major component of glycocalyx that

66 interfaces between flow stress and vascular endothelium. Notably, knockdown of

67 hyaluronidase-1 in PCV BOEC improved mechanosensitivity through activation of

68 Krüppel-like factor 2, a flow-responsive transcription factor, which in turn modulated

69 PCV BOEC migration. Barrier permeability due to glycocalyx impairment in PCV

70 BOECs was also reversed by hyaluronidase-1 knockdown. Correspondingly,

71 hyaluronidase-1 was detected in PCV patient vitreous humor and plasma samples.

72 **Conclusions:** Hyaluronidase-1 inhibition could be a potential therapeutic modality in

73 preserving glycocalyx integrity and endothelial stability in ocular diseases with

74 vascular origin.

75 **Keywords**

76 Endothelial dysfunction; glycocalyx; hyaluronidase-1; polypoidal choroidal

77 vasculopathy; age-related macular degeneration

78

79 **Background**

80 Polypoidal choroidal vasculopathy (PCV), known to be a subtype of age-  
81 related macular degeneration (AMD), and is a major cause of vision loss in elderly  
82 populations. PCV is distinguished by the pathological presence of choroidal vessel  
83 networks with terminal polypoidal dilatations [1, 2]. The clinical diagnosis of PCV is  
84 confirmed by the visualization of vascular dilatation as hyperfluorescent nodules  
85 under indocyanine green angiography or orange-red subretinal nodules in routine  
86 ophthalmoscopic examinations [3-7]. Similar to typical neovascular AMD, PCV  
87 patients suffer from serosanguineous pigment epithelial detachment and submacular  
88 exudations resulting in a gradual loss of visual acuity [8, 9]. A background of  
89 choroidal vascular hyperpermeability is more frequently reported in PCV than in  
90 AMD [10]. Importantly, response of PCV to anti-vascular endothelial growth factor  
91 (anti-VEGF) therapy has been less consistent. In particular, while anti-VEGF controls  
92 the exudation, the underlying polypoidal lesion often fails to regress [8]. This current  
93 lack of effective therapeutic options for PCV that is refractory to anti-VEGF  
94 treatments reflects unresolved questions in the etiology of PCV.

95

96 Epidemiologic studies of PCV to date revealed a greater prevalence of PCV in  
97 populations of Asian (22-55% of neovascular AMD cases) and African descent [11]  
98 than Caucasian populations (8-13% of neovascular AMD cases) [12, 13]. Several  
99 cohort-based genome-wide association studies (GWAS) have revealed neovascular

100 AMD to be a multifactorial disease with many single nucleotide polymorphisms  
101 (SNPs) identified to be significantly associated with the risk of disease development  
102 [14, 15]. However, GWAS studies have reported similar associations of SNPs in both  
103 PCV and neovascular AMD subtypes, with only rs10490924 in the age-related  
104 maculopathy susceptibility 2/high-temperature requirement A serine peptidase 1  
105 (*ARMS2/HTRA1*) region showing significantly stronger association with PCV than  
106 neovascular AMD [14, 16-18]. The current understanding suggests that  
107 pathogenesis of PCV is likely an interplay of polygenic, biological and environmental  
108 factors [19].

109

110 The defining clinical feature of vascular dilatation in PCV suggests a unique  
111 perturbation to blood flow experienced by the choroidal endothelia. Indeed, optical  
112 coherence tomography angiography of PCV eyes, in combination with variable  
113 interscan time analysis revealed the varied nature of blood flow velocities within  
114 polyps with the center of polyps experiencing slower flow than the periphery, thus  
115 providing evidence for non-uniform flow within these vascular dilatations [20, 21].  
116 The causes of these vascular malformations and the effects of non-uniform blood  
117 flow on the endothelium of these polyps are currently unknown.

118

119 Moreover, while several murine models for macular degeneration have been  
120 described, the mouse eye lacks a defined macula [22, 23] and laser-induced  
121 choroidal neovascularization models largely do not recapitulate polypoidal lesions in  
122 PCV [24]. In order to capture some of these genetic and environmental complexities  
123 in a human-relevant disease model, we leveraged on the use of patient-derived  
124 blood outgrowth endothelial cells (BOECs). BOECs can be derived *in vitro* from

125 circulating endothelial colony-forming cells that originate from bone marrow or vessel  
126 resident stem cells [25-29]. With minimal manipulation, these cells give rise to  
127 mature endothelial cells in culture that are more likely to retain the genetic and  
128 epigenetic landscape of individuals [30]. Since it is well-known that endothelial cells  
129 are mechano-sensors that respond to shear stress by blood flow [31], we subject  
130 BOECs to variable and pulsatile flow conditions in order to recapitulate the dynamics  
131 within PCV polyps. Through single-cell analysis, we were able to discern  
132 transcriptional signatures of endothelial cells in response to heterogeneous flow and  
133 show that PCV and normal BOECs adopt distinct cell states under these conditions.  
134 Our findings demonstrate the powerful utility of patient-derived BOECs in modelling a  
135 complex vascular disease and illuminate molecular differences that can underlie the  
136 pathogenesis of PCV.

137  
138

## 139 **Results**

### 140 ***Derivation and characterization of human blood outgrowth endothelial cells***

141 We developed our BOEC models from peripheral blood mononuclear cell  
142 (PBMC) fractions isolated from PCV and normal donors according to established  
143 protocol [32]. Early colonies of BOECs emerged generally 7-14 days post-seeding of  
144 PBMCs (Fig. 1a). BOEC colonies were expanded for one week prior to passaging.  
145 On average for both normal and PCV groups, we obtained 1-3 colonies from every  
146 10 million PBMCs (Fig. 1b). The proliferation capacity of BOECs were monitored  
147 from passages 3-8 when most of the BOEC lines demonstrated steady cell  
148 population doubling time (Fig. 1c). In our experimentations, we excluded potentially  
149 senescent BOECs if there was substantiate increase in their cell doubling time. To  
150 confirm endothelial identity, our derived BOECs were highly enriched for endothelial

151 cell markers such as CD31 (> 99%) and CD144 (> 94%), but they had negligible  
152 expressions for leukocyte markers CD45 and CD68, and progenitor cell marker  
153 CD133, suggesting purity of our BOEC cultures (Fig. 1d). We further performed  
154 functional characterization of BOECs. PCV and normal BOECs were able to form  
155 tubular networks and showed comparable attributes (i.e. number of junctions,  
156 number of loops, branching length) with the positive control, human umbilical vein  
157 endothelial cells (HUVECs) (Fig. 1e). In a three-dimensional fibrin gel bead sprouting  
158 assay, our BOECs also displayed sprouting with filopodia, characteristic of  
159 endothelial protrusions in mediating guidance cues during angiogenesis (Fig. 1f).  
160  
161 Based on marker expressions and functional characterization, both PCV and normal  
162 BOECs demonstrated comparable attributes. Extrinsic factors such as complement  
163 dysregulation and oxidative stress, as well as retinal pigment epithelial (RPE) cells  
164 being one of the main producers of VEGF in the eye, play key roles in pathological  
165 endothelial behaviors [33]. To understand RPE cells' paracrine effects on endothelial  
166 function, induced pluripotent stem cells (iPSCs) were created through Sendai-based  
167 reprogramming of PBMC samples from PCV and normal individuals. We generated 4  
168 iPSC lines from 2 PCV patients and 4 iPSC lines from 2 normal individuals  
169 (Supplemental Table S1). All PCV lines were homozygous for the risk alleles in  
170 *ARMS2/HTRA1* locus, and heterozygous at *CFH* locus. All the normal lines  
171 harboured protective alleles in at least 1 locus. The derived iPSC lines showed  
172 tightly packed colonies and expressed classical markers of pluripotency, as well as  
173 germ layer markers upon embryoid body differentiation (Supplemental Figure S1a).  
174 RPE differentiation was then performed on PCV and normal iPSCs based on  
175 established protocols [34] to derive iPSC-RPE cells which developed pigmentation

176 from day 34 of differentiation onwards (Supplemental Figure S1b). After monolayers  
177 of iPSC-RPE cells were re-seeded onto transwell to induce polarity, we confirmed  
178 their barrier integrity, typical of RPE cells, by trans-epithelial electrical resistance  
179 measurements over time until day 71 post-seeding (Supplemental Figure S1c). To  
180 validate RPE cells' contribution to secreted VEGF, we found that iPSC-RPE  
181 conditioned media from the basal compartments had seemingly greater amount of  
182 VEGF than that from the apical compartments (Supplemental Figure S1d),  
183 consistent with RPE cell biology. However, we did not observe difference in VEGF  
184 production between PCV and normal iPSC-RPE cells based on the current number  
185 of cell lines. Likewise, there was no significant difference in VEGF levels between  
186 PCV and normal plasma samples (Supplemental Figure S1e). We postulated that  
187 there could be other systemic mediators affecting endothelial health. Hence, we  
188 exposed PCV and normal BOECs to autologous plasma and found that some  
189 angiogenic attributes could be intensified by plasma stimulation (Supplemental  
190 Figure S1f). As there is a multitude of paracrine influences which are known to cause  
191 endothelial dysfunction, the knowledge gaps in PCV endothelial cell autonomous  
192 effects remain understudied. We hereby focused on deciphering intrinsic endothelial  
193 mechanisms which could be further interrogated in our PCV BOEC disease model.

194

195 ***Blood outgrowth endothelial cells adopt diverse cell states under***  
196 ***heterogeneous flow***

197 Among our derived BOEC lines (13 PCV, 11 normal), we prioritized those that  
198 passed quality controls in terms of endothelial marker expressions and functional  
199 attributes (Fig. 1). In addition, we genotyped the BOEC lines for AMD/PCV genetic  
200 risk loci in *ARMS2/HTRA1* (rs10490924 and rs11200638) and *CFH* (rs800292).

201 Collectively, we selected 4 PCV and 6 normal lines for further experimentation  
202 (Supplemental Table S1). Three PCV donors were homozygous for the risk alleles in  
203 *ARMS2/HTRA1* locus, and 2 PCV donors were heterozygous at *CFH* locus. All the  
204 normal controls harboured protective alleles in at least 1 locus.  
205  
206 We introduced heterogeneous flow as a stress paradigm to PCV and normal  
207 BOECs. To recapitulate the variable flow conditions in PCV polyps, we utilized an  
208 orbital flow setup to generate a continuum of shear forces with high magnitude,  
209 uniaxial shear stresses at the edge of wells and low magnitude, multidirectional  
210 shear stresses in the center [35]. PCV and normal BOECs were exposed to 24h of  
211 rotation (Fig. 2a). Peak fluid shear in our setup was estimated to be around 10  
212 dyne/cm<sup>2</sup> using  $\tau_{max} = \alpha\sqrt{\rho\eta(2\pi f)^3}$ , with  $\alpha$  being the orbital radius (0.1cm),  $\rho$  as  
213 density of medium (assumed 0.9973g/mL) [36],  $\eta$  as the medium viscosity (assumed  
214 0.0101 poise) [36] and  $f$  as the frequency of rotation (210/60rps) [36, 37]. In a  
215 similar setup using a 6-well plate, optical Doppler velocimetry measured shear stress  
216 of 5 dyne/cm<sup>2</sup> at the center of the well and 11 dyne/cm<sup>2</sup> at the periphery [36]. This  
217 range of shear stress magnitudes is well within reported physiological range where  
218 shear stresses have been described at  $\pm 4$  dyne/cm<sup>2</sup> around curvatures, bifurcations  
219 and branches, while straight arterial regions experience shear forces of  
220 approximately 10 – 20 dyne/cm<sup>2</sup>, at times reaching 40 dyne/cm<sup>2</sup> [38]. The effects of  
221 this heterogeneous flow can be seen from the staining of vascular endothelial  
222 cadherin (CDH5) (Fig. 2b), where both PCV and normal BOECs demonstrated  
223 alignment to flow direction at well periphery but not in the center. Correspondingly,  
224 caveolin-1 (CAV1) which forms part of the endothelial mechanosensing machinery



225 [39], showed re-distribution to BOEC cell edges as a response to higher shear stress  
226 at the well periphery (Fig. 2b).

227

228 To uncover the molecular underpinning of PCV endothelial abnormalities, we  
229 performed single-cell RNA sequencing (scRNA-seq) to resolve transcriptomic  
230 differences between PCV and normal BOECs in response to heterogeneous flow.  
231 Our single-cell analysis revealed 5 clusters of transcriptionally distinct cell states that  
232 we classified as 1) Proinflammatory, 2) Migratory-Angiogenic, 3) Transitory-  
233 Proliferative, 4) Proliferative and 5) Quiescent cells (Fig. 2c). These cell states were  
234 determined firstly by analysis of cluster-enriched marker genes. For example,  
235 representative genes such as inflammatory markers *CXCL8* and *TGF $\beta$ 2*, as well as  
236 cell cycle/ proliferation markers *MKI67*, *PCLAF* and *TOP2A* were among the top 10  
237 cluster-enriched marker genes where the highest average expression for each gene  
238 corresponded to their identified cell states (Fig. 2d). Furthermore, expression  
239 patterns of cell state-defining marker genes were conserved between PCV and  
240 normal datasets (Supplemental Fig. S2c).

241

242 Secondly, we confirmed cell state identities by the predominant processes found  
243 from gene enrichment analyses of top cluster-specific marker genes using Gene  
244 Ontology [40, 41] and Reactome [42] databases. Enriched processes for the  
245 Proinflammatory cell state included myeloid leukocyte adhesion, neutrophil activation  
246 and platelet degranulation, while those for Migratory-Angiogenic cell state included  
247 positive regulation of endothelial cell migration, angiogenesis and hyaluronan (HA)  
248 uptake and degradation (Fig. 2e, Supplemental Fig. S2d and e). The Transitory-  
249 Proliferative and Proliferative cell states shared several processes such as nuclear

250 division and cell cycle (Supplemental Fig. S2d and e). Taken together, both PCV and  
251 normal BOECs adopted diverse transcriptomic cell states in response to  
252 heterogeneous flow.

253

254 ***PCV and normal endothelial cells demonstrate differential responses to***  
255 ***heterogeneous flow***

256 In discerning meaningful differences between PCV and normal BOECs, we  
257 found a majority of normal BOECs adopt Proinflammatory cell state (50.36%) under  
258 flow treatment. Notably, we noticed a distinct departure in PCV BOECs, with the  
259 majority of cells found in Migratory-Angiogenic cell state instead (41.69%) (Fig. 3a).  
260 These differences represented a primary shift between Proinflammatory and  
261 Migratory-Angiogenic cell states as the other cell states remain comparable between  
262 PCV and normal in terms of cell proportions. These changes in cell proportions were  
263 found largely conserved across each of the PCV and normal BOEC samples, ruling  
264 out bias arising from inter-individual variabilities (Supplemental Fig. S3a).

265

266 Next, we performed differential expression analysis between PCV and normal  
267 datasets with a focus on combined Proinflammatory and Migratory-Angiogenic cell  
268 states. Gene set enrichment analyses of PCV downregulated genes revealed largely  
269 inflammation-related events such as neutrophil activation and neutrophil-mediated  
270 immunity (adj.  $p < 0.01$ ) (Fig. 3b), indicating that PCV BOECs expressed a weaker  
271 proinflammatory profile than their normal counterparts. Gene set enrichment analysis  
272 was expanded to include databases from KEGG [43] and MsigDB [44] to reveal  
273 enrichment of key pathways such as Cytokine Signaling in Immune system (R-HAS-  
274 1280215, Reactome), Inflammatory response (Hallmark, MSigDB), Fluid shear

275 stress and atherosclerosis (hsa05418, KEGG) and Cellular responses to external  
276 stimuli (R-HAS-8953897). Module scores for the average expression of genes in  
277 these pathways demonstrated the degree of differential expression between PCV  
278 and normal BOECs for these gene sets (Fig. 3c). Upregulation of proinflammatory  
279 genes (e.g. *CXCL8*, *ICAM*) are well-described processes in endothelial cells  
280 subjected to disturbed, multidirectional flow [45]. Our findings suggested reduced  
281 sensitivity to flow by PCV BOECs in contrast to normal BOECs.

282

283 In addition, we found significant enrichment in oxidative stress response and  
284 oxidative phosphorylation related processes with PCV BOECs expressing lower  
285 levels of genes involved in detoxification of reactive oxygen species and respiratory  
286 electron transport chain Fig. 3d(i). MitoSOX Red staining for superoxide and  
287 mitochondrial activity measurements validated these transcriptomic findings with  
288 PCV BOECs showing significantly higher levels of oxidative stress and lower  
289 mitochondrial functions than normal BOECs (Fig. 3d(ii) and (iii)) ( $p < 0.05$ ).

290 Antioxidant response genes such as superoxide dismutases (*SOD1*) are upregulated  
291 in endothelial cells as a protective response to oxidative stress in oscillatory flow  
292 [45]. Our MitoSOX staining and lower mitochondrial functions might explain a  
293 repressed protective response in PCV BOECs towards heterogeneous flow.

294

### 295 ***PCV endothelial cells have increased migratory capacity and barrier*** 296 ***permeability***

297 In addition to reduced flow response, PCV BOECs had a stronger migratory  
298 transcriptomic profile than normal BOECs. Our gene set enrichment analyses of the  
299 PCV upregulated genes showed that the major enriched processes revolved around

300 cell migration and cell locomotion, in particular blood vessel endothelial cell migration  
301 (GO:0043534) (Fig. 4a). To functionally validate these transcriptomic differences, we  
302 went on to assess the migratory capacity of PCV and normal BOECs in a wound  
303 healing assay. PCV BOECs demonstrated significantly greater wound closure than  
304 normal BOECs with and without exposure to orbital flow, although the differences  
305 between PCV and normal were greater after 24h of heterogeneous flow ( $23.17\% \pm$   
306  $3.892$ ,  $p < 0.0001$ ) than static cultures ( $20.75\% \pm 5.865$ ,  $p = 0.0046$ ) (Fig. 4b).  
307 Intimately linked to the process of cell migration, extracellular matrix (ECM)  
308 modifying processes were also found to be significantly enriched in the PCV  
309 upregulated gene set (Fig. 4c), in particular proteases such as *MMP1*, *MMP16* and  
310 *ADAMTS18* (Supplemental Fig. 3b).

311  
312 In linking reduced flow response to increased migratory capacity in PCV BOECs, we  
313 hypothesized a perturbed extracellular milieu that interfaced between flow and  
314 endothelial cells. Further to the enrichment of ECM-degrading processes in PCV  
315 upregulated genes, syndecan interactions (R-HAS-3000170) was found to be  
316 significantly downregulated in PCV BOECs (Fig. 4c). Syndecans are part of the  
317 endothelial glycocalyx, which is a mechanosensing meshwork of  
318 glycosaminoglycans covering the luminal surface of endothelial cells, held covalently  
319 by proteoglycan core proteins<sup>40</sup>. Its apical positioning and extensive coverage of the  
320 cell surface enables sensing and transduction of hemodynamic forces to interacting  
321 partners on the plasma membrane [46, 47]. Here, we looked at the expression  
322 profiles of glycocalyx-related genes and found significantly lowered expression in  
323 PCV for heparan sulfate (HS) core proteins (*GPC1*, *SDC2*, *SDC3* and *SDC4*) and  
324 HA core protein (*CD44*), while genes for HA degrading enzymes (*HYAL1* and

325 CEMIP2) were significantly higher in PCV (Fig. 4d). Also,  $\beta$ 1 integrin (*ITGB1*), a  
326 reported mechano-sensor of blood flow usually upregulated in the presence of flow  
327 [48] was found to be downregulated in PCV relative to normal BOECs.

328

329 Phenotypically, we used an image-based permeability assay and demonstrated  
330 significantly larger areas of intracellular gaps in PCV BOEC monolayers than normal  
331 BOEC monolayers in both static and rotated conditions (Fig. 4e). Similar to the  
332 wound healing migration assay, differences between PCV and normal BOECs in  
333 barrier permeability became exacerbated after heterogeneous flow treatment  
334 ( $163.0\% \pm 34.91$ ,  $p < 0.0001$ ) than without ( $74.09\% \pm 17.02$ ,  $p = 0.0007$ ). These results  
335 revealed fundamental differences between PCV and normal BOECs in endothelial  
336 functions in the forms of barrier integrity and migratory capacity, which were  
337 amplified by disturbed flow conditions.

338

### 339 ***Increased HYAL1 levels in PCV endothelial cells impair glycocalyx***

340

341 The integrity and composition of endothelial glycocalyx can determine the  
342 efficiency and extent of mechano-sensitivity and force transduction [46, 47]. Of the 6  
343 known genes coding for hyaluronidases in humans [49], we found *HYAL1* to be  
344 expressed at a significantly higher level in PCV than normal BOECs across both  
345 Proinflammatory and Migratory-Angiogenic clusters (Fig. 4d and Supplemental Fig.  
346 S3b). Hence, we selected *HYAL1* for further validation due to the strong differential  
347 expression in the transcriptomic data and its active functional role in modifying  
348 glycocalyx composition through its hyaluronan (HA) degrading activities. Western  
349 blot analyses of BOEC lysates, subjected to heterogeneous flow, validated the  
350 increased expression of *HYAL1* in PCV BOECs at the proteomic level (Fig. 5a).

351 HYAL1 is a secreted protein that is endocytosed and activated at low pH in  
352 lysosomes [50, 51]. As such, we probed the proteolytic activity of secreted HYAL1  
353 and found greater degradation of HA ( $p=0.0194$ ) using conditioned media from PCV  
354 BOECs subjected to heterogeneous flow (Fig. 5b). Higher levels of HYAL1 were also  
355 detected in these conditioned media of PCV BOECs as quantified by ELISA (Fig.  
356 5c). Subsequently, HYAL1 was detectable in PCV patients' plasma and eye vitreous  
357 humor extracts (Fig. 5d).

358

359 Using a biotinylated-HA binding protein (HABP), we were able to visualize the HA  
360 component of BOEC glycocalyx and observed an overall decrease in HA staining in  
361 PCV BOECs relative to normal BOECs after heterogeneous flow (Fig. 5e).  
362 Volumetric analyses of HA-staining across z-stacks revealed a significantly lower HA  
363 volume in PCV BOECs exposed to heterogeneous flow at the center of well (Fig.  
364 5e). While we observed the same trend in BOECs at the periphery of well, significant  
365 difference of HA content between PCV and normal BOECs was not achieved. As  
366 aforementioned, flow conditions in the center of well had relatively lower shear stress  
367 and higher multi-dimensionality than that found at the periphery of well. Collectively,  
368 these results validated the transcriptomic data of higher *HYAL1* expression in PCV  
369 BOECs and suggest that PCV BOECs may experience a higher HA turnover and  
370 breakdown under pathological flow conditions.

371

### 372 ***Modulation of HYAL1 restores normal cell migration and barrier integrity in*** 373 ***PCV endothelial cells***

374 Finally, we evaluated if the increased expression of HYAL1 in PCV BOECs  
375 can play a role in mediating the functional phenotypes of increased migratory

376 capacity and barrier permeability. We used small-interfering RNA (siRNA) to silence  
377 gene expressions of *HYAL1* that were confirmed at protein levels in the human  
378 BOECs (Fig. 6a). *HYAL1* knockdown (si*HYAL1*) was able to reduce wound closure  
379 percentage in PCV samples significantly ( $p=0.046$ ) at 50nM, while normal BOECs  
380 remained unperturbed (Fig. 6b). The knockdown of *HYAL1* was also able to restore  
381 PCV migratory capacity to the similar level as normal BOECs (Fig. 6b). We  
382 postulated that knockdown of *HYAL1* might improve mechanosensing ability in PCV  
383 BOECs, in part through preserving HA in endothelial glycocalyx. Hence, we  
384 examined the flow-responsive transcription factor, Krüppel-like factor 2 (*KLF2*)[52],  
385 and found that *KLF2* expressions were indeed activated in BOECs exposed to  
386 heterogeneous flow compared to static condition (Fig. 6c). *HYAL1* knockdown further  
387 upregulated *KLF2* level significantly in PCV BOECs under flow, but not in normal  
388 BOECs (Fig. 6c). This might explain the aforementioned observation that PCV  
389 BOEC migratory capacity could be effectively modulated by *HYAL1* knockdown,  
390 possibly through activation of *KLF2*, which in turn exerted anti-migratory effect on  
391 endothelial cells[53]. Furthermore, *HYAL1* knockdown significantly reduced barrier  
392 permeability in PCV BOECs to a level similar to normal BOECs transfected with non-  
393 targeting siRNA (NT) ( $p=0.0483$ ) (Fig. 6d). Hence, *HYAL1* modulation could reverse  
394 abnormal PCV endothelial cell migration and barrier permeability.

395  
396

## 397 **Discussion**

398           We have addressed a major knowledge gap in the endothelial  
399 underpinning of PCV as most ocular disease modeling studies have focused on the  
400 biology of RPE cells. Previously, the difficulty of culturing human primary choroidal  
401 endothelial cells in comparison to human RPE cells could underlie the dearth of



402 studies on the role of endothelial cells. Here, derivation of BOECs represents a  
403 minimally-invasive method of establishing disease-relevant endothelial cells for  
404 experimentations. We report single-cell analysis of the differential responses of  
405 human endothelial cells from healthy controls and PCV patients to heterogeneous  
406 flow. We found that PCV BOECs are abnormally migratory and have increased  
407 barrier permeability. This is due in part to their enhanced expression of HYAL1,  
408 whose knockdown restores endothelial stability in PCV. Our key finding explains an  
409 intrinsic mechanism of endothelial dysfunction, potentially contributing to leaky  
410 choroidal vessels and structurally abnormal vascular dilatation in PCV.  
411  
412 ECM-modifying factors form the central network in our PCV endothelial autocrine  
413 mechanism that may drive the hyperpermeability and vessel dilatations observed in  
414 PCV eyes. Our comparative single-cell analysis identified increased expressions of  
415 ECM-modifiers with established roles in angiogenesis and vascular permeability,  
416 which corroborated earlier studies that implicated ECM degradation in PCV  
417 pathogenesis [54]. Intriguingly, the heterogeneous flow response in PCV BOECs and  
418 differential levels of glycocalyx-related genes led us to hypothesize potential  
419 perturbations in the flow-sensing extracellular components of PCV endothelial cells.  
420 Glycocalyx, a carbohydrate-rich layer on the luminal surface of vascular  
421 endothelium, creates a cell-free, permeable zone between the blood flow and  
422 endothelial cells, regulating permeability of the endothelium through size and steric  
423 hindrance [55, 56], signaling by plasma-borne endocrine factors and reducing  
424 attachment of inflammatory immune cells [57, 58]. The glycocalyx plays an important  
425 role in the mechanotransduction of shear stresses. Enzymatic degradation or shear-  
426 induced shedding of any component of the glycocalyx can severely impact some of



427 these functions [58, 59]. Infusion of canine femoral arteries with hyaluronidase or  
428 cultured endothelial cells with heparitinase both resulted in reduction of shear-  
429 induced nitric oxide (NO) production [60, 61]. The application of shear stress to  
430 human umbilical vein endothelial cells (HUVEC) also resulted in an increase in HA in  
431 the glycocalyx in a postulated positive feedback mechanism [62]. Hyaluronidase-1 is  
432 an endocytosed, acid-active enzyme that can break down HA chains of any size into  
433 tetrasaccharides [63, 64]. While plasma-borne HYAL1 has been found to have a  
434 short half-life of around 2-3 mins [65, 66], we found very low levels of HYAL1 in our  
435 PCV vitreous humor samples in contrast to plasma, therefore indicating a likely  
436 autocrine role for the increased HYAL1 produced by PCV endothelial cells.

437

438 Elevated levels of HYAL1 and HA have also been reported in systemic diseases  
439 such as severe dengue [67] and diabetes [68] where glycocalyx degradation,  
440 vascular instability and hyperpermeability effects have been associated. Of note,  
441 age-related reduction in HA in the Bruch's membrane have been observed in human  
442 eyes [69]. Consistent with reports where short-chain HA deposits can direct and  
443 drive endothelial cell migration [68, 70], our data shows that HYAL1 levels can  
444 mediate endothelial cell migration. Both increased barrier permeability and  
445 endothelial cell migration are processes linked to overall vascular instability. We are  
446 mindful that we do not have typical neovascular AMD as a comparison in the current  
447 study. Our patient cell-based studies may paint an incomplete picture for the  
448 development of aneurysmal dilatations in PCV. Nonetheless, we were able to  
449 uncover and demonstrate a previously unreported role for glycocalyx integrity in PCV  
450 pathogenesis and present HYAL1 as an autocrine mediator of endothelial  
451 dysfunctions in PCV endothelial cells (Fig. 7).

452

## 453 **Conclusions**

454           Understanding mechanisms of diseases affecting ocular integrity is an  
455 important area. Our patient endothelial model provides molecular and phenotypic  
456 insights into PCV pathophysiological processes which would inform further  
457 development of *in vivo* models, as well as pave the way for therapeutic  
458 advancement. The fundamental endothelial mechanism presented here could be far-  
459 reaching beyond PCV, and potentially a contributor to the pathogenesis of ocular  
460 diseases with a vascular origin, suggesting that many pathologies could be  
461 ameliorated by better knowledge of endothelial disease biology.

462

463

## 464 **Materials and Methods**

### 465 ***Patient selection and sample collection***

466 We enrolled subjects from the retina clinic of the Singapore National Eye Center.  
467 Inclusion criteria were age 40-80 years (demographics detailed in Supplemental  
468 Tables S1 and S2). Written informed consent was obtained from each participant.  
469 This study was approved by the Local Ethics Committee of SingHealth Centralised  
470 Institutional Review Board (CIRB Refs: R1496 and 2018/2004) and Nanyang  
471 Technological University Singapore Institutional Review Board (IRB-2018-01-026  
472 and IRB-2019-03-011-01).  
473 For patients with PCV, the clinical diagnosis was confirmed on fundus examination  
474 and fluorescein and indocyanine green angiography. PCV was confirmed based on  
475 the presence of polypoidal dilatations on ICGA. Healthy volunteers were recruited for

476 the control group. Controls were further selected based on absence of AMD or PCV  
477 from clinical examination. For sample collection, 10mL of fresh blood was collected  
478 from each participant and processed in the laboratory within 6 hours. Upon ficoll  
479 centrifugation of the blood specimen, a buffy coat layer containing peripheral blood  
480 mononuclear cells (PBMCs) was isolated from which DNA extraction was performed  
481 for genotyping with the OmniExpress chip. The rest of the PBMCs was used for two  
482 purposes - (1) Cultivated in cell culture to derive blood outgrowth endothelial cells  
483 (BOECs); (2) Expanded in cell culture and used for reprogramming towards induced  
484 pluripotent stem cells (iPSCs).

485

#### 486 ***Derivation of BOECs and culture conditions***

487 Blood samples were collected from donors as detailed in Supplemental Table S1.  
488 BOECs were generated as per described [32] with modifications. Briefly, peripheral  
489 blood samples (5 – 9 mL per donor) was diluted 1:1 with phosphate-buffered saline  
490 (PBS) and separated to obtain buffy coat by density gradient centrifugation over  
491 Ficoll® Paque (GE Healthcare). The buffy coat, which was enriched with peripheral  
492 blood mononuclear cells (PBMCs), was carefully collected, washed with PBS,  
493 resuspended in heparin-free, EGM-2 medium (Lonza) supplemented with 16%  
494 defined foetal bovine serum (FBS; Hyclone) and counted. Plasma was also collected  
495 and stored at -80°C. Then, the PBMCs were seeded into collagen I-coated well(s)  
496 accordingly so that the cell density was  $\geq 1.5 \times 10^6$  cells/cm<sup>2</sup>. Medium was changed  
497 every two to three days. Outgrowth colonies should appear between seven to 14  
498 days post-seeding. The cells were expanded to passage 3 before any applications  
499 were performed on them, including phenotyping and functional evaluation, in order to  
500 opt out unwanted leukocytes. After passage 3, BOECs were cultured on collagen-I-

501 coated tissue culture dishes in heparin-free, EGM-2 with 10% heat-inactivated FBS  
502 with media change every 2 – 3 days. BOECs from passages 4 to 8 were used in  
503 experiments.

504

#### 505 ***Endothelial tube formation***

506 Tube formation assay was performed according to manufacturer instructions  
507 (Endothelial Cell Tube Formation Assay, Corning). More details are found in  
508 Supplemental Methods.

509

#### 510 ***Fibrin gel bead sprouting assay***

511 To evaluate the angiogenesis ability of BOECs, fibrin gel bead sprouting assay was  
512 performed as per described [71] with modifications. More details are found in  
513 Supplemental Methods.

514

#### 515 ***Induced pluripotent stem cell generation and RPE cell differentiation***

516 Frozen PBMCs that were previously obtained from density gradient centrifugation via  
517 Ficoll-Paque, were thawed and reprogrammed using CytoTune-iPS 2.0 Sendai  
518 Reprogramming Kit (Thermo Fisher Scientific) under Reprogram PBMCs (Feeder-  
519 free) section. Once emerging colonies were observed, they were manually picked for  
520 expansion into individuals iPS cell lines while being transferred to Matrigel-coated  
521 plates (Corning, 354234) and cultured in mTeSR™1 (STEMCELL Technologies).  
522 After successfully stabilizing of at least 2 clones per reprogrammed cell line, cells  
523 were expanded further in mTeSR™1 and passaged using 0.5mM EDTA passaging  
524 solution (Sigma Aldrich).

525 Patient-specific iPS cell lines undergo RPE differentiation following protocol [34] with  
526 some modifications. Changing of medium with the addition of growth factors was  
527 done on day 0, 3,5 and 7 then every 2 days till first pigmentation was observed (day  
528 20). Around Day 30, immature RPE cells were seeded at a density of  $1 \times 10^5$   
529 cells/cm<sup>2</sup> onto growth factor reduced ECMH (Corning)-coated transwells and allowed  
530 to be mature for 4-6 weeks in RPE medium (XVIVO 10, Lonza). Matured RPE at P1  
531 or P2 were used in downstream experiments.

532

### 533 ***Functional characterization of iPSC-RPE cells***

534 More details are found in Supplemental Methods.

535

### 536 ***Orbital flow setup***

537 BOECs were trypsinized and counted with 0.4% Trypan Blue (Gibco, Thermo Fisher  
538 Scientific) staining on an automated cell counter (Countess II, Thermo Fisher  
539 Scientific) before diluting and seeding onto rat-tail collagen Type1 (Corning)-coated  
540 12-well plates to give 120,000 viable cells per well. Seeded wells were incubated for  
541 48h in a 5% CO<sub>2</sub>, 37°C, humidified incubator before overlying media was replaced  
542 with 800µl of fresh heparin-free, EGM-2 medium (10% heat-inactivated FBS) to give  
543 a liquid height of ~2mm per well. Plates were then replaced onto an orbital shaker in  
544 a 5% CO<sub>2</sub>, 37°C, humidified incubator and rotated at 210rpm for 24h. Static controls  
545 were setup in the same manner under the same conditions, with 800µl of fresh  
546 heparin-free, EGM-2 medium (10% heat-inactivated FBS) replaced after 48h post-  
547 seeding and replaced into the incubator without rotation.

548

549 ***Single-cell RNA sequencing and analysis***

550 BOECs from 2 PCV and 2 normal lines were seeded and subjected to orbital flow as  
551 described in Orbital Flow Setup. After 24h of orbital flow, the BOECs were  
552 trypsinized, resuspended in heparin-free, EGM-2 medium (10% heat-inactivated  
553 FBS) and counted using Trypan blue and an automated cell counter (Countess II,  
554 Thermo Fisher Scientific) and resuspended appropriately for loading onto 10X  
555 Genomics Chromium Controller chip by facility personnel at Single-cell Omics Centre  
556 (SCOC), Genome Institute Singapore (GIS). Each BOEC cell line was prepared as a  
557 separate scRNA-seq library using Chromium Single Cell 3' v3 Reagent Kit (10X  
558 Genomics) by SCOC GIS and the final ready-to-sequence libraries were handed  
559 over with quantification and quality assessment reports from Bioanalyzer Agilent  
560 2100 using the High Sensitivity DNA chip (Agilent Genomics). Individual libraries  
561 were pooled equimolarly and sent for sequencing by NovogeneAIT Genomics  
562 (Singapore). Raw sequencing data was also processed by NovogeneAIT Genomics  
563 (Singapore) using Cell Ranger (10x Genomics) with reads mapped to the human  
564 genome assembly (GRCh38).  
565 We performed secondary analysis on the resultant filtered matrix files using Seurat  
566 (v 3.2.0) [72]. Data was filtered for dead/poor quality cells based on low number of  
567 genes detected (<200) or potential doublets (>9500) as recommended by Seurat's  
568 tutorial (satijalab.com) and inspection of nFeature spread for each sample  
569 (Supplemental Fig. S2a). Cells with high percentage of mitochondrial genes were  
570 also removed with the threshold of less than 20% informed by a previously reported  
571 percentage of mitochondrial gene content in endothelial cells [73]. In order to inspect  
572 for any cell cycle heterogeneity between samples, cell cycle states for each sample  
573 were determined by the *CellCycleScoring* function in Seurat (Supplemental Fig.

574 S2b). These filtered datasets were then scaled and normalized using *SCTransform*  
575 individually before integrated based on 3000 integration features. Clusters were  
576 identified in the integrated dataset using the *FindCluster* function at resolution 0.2,  
577 after PCA analysis, *RunUMAP* and *FindNeighbours* at 1:30 dimensions. Marker  
578 genes were then identified for each cluster using *FindAllMarkers* with MAST [74] (R  
579 package) as the selected test of choice. Differential expression analysis between PCV  
580 and normal datasets were performed using *FindMarkers* with MAST for each  
581 individual cluster. Gene enrichment analysis was carried out for both marker genes  
582 of clusters and differential expression genes between PCV and normal in each  
583 clusters using clusterProfiler (R package, v 3.17.0.) [75]. *AddModuleScore* function  
584 (Seurat) was used to present overall relative expression profiles between PCV and  
585 normal, for genes found in the indicated enriched processes.

586

### 587 ***MitoSOX assay***

588 BOECs treated to 24h of flow or static conditions on glass-bottom wells were stained  
589 with MitoSOX Red mitochondrial superoxide indicator according to manufacturer  
590 instructions (Cat. no. M36008, Thermo Fisher Scientific). More details are found in  
591 Supplemental Methods.

592

### 593 ***Mitochondrial function assay by Seahorse analyzer***

594 BOECs were reseeded onto collagen-I-coated 96-well Seahorse microplates at  
595 20,000 cells per well and incubated in a humidified incubator at 37°C, 5% CO<sub>2</sub> for 5h.  
596 Thereafter, they were prepared and assayed for mitochondrial function assessment  
597 according to manufacturer instructions (Seahorse XF Cell Mito Stress Test Kit,  
598 Agilent Technologies). More details are found in Supplemental Methods.

599

600 ***Wound healing assay***

601 BOEC cultures, prepared as described in Orbital Flow Setup section, were scratched  
602 across the horizontal diameter of each well with a P200 micropipette tip before  
603 imaging on an automated microscope (Celldiscoverer 7, ZEISS) using a 5x objective  
604 over time. Multi-tile images were captured to encompass the entire scratch wound at  
605 time=0h, under live-cell imaging conditions (5% CO<sub>2</sub>, 37°C). Culture plates were then  
606 replaced into a 5% CO<sub>2</sub>, 37°C, humidified incubator and left to recover without  
607 rotation (for both rotated and static conditions) for 21h. The same tiling positions  
608 determined for each well at 0h were reused for the imaging at 21h. Wound area was  
609 obtained using manual region-of-interest (R.O.I) annotation of cell free areas across  
610 each tiled image set before area of R.O.I. was obtained using Measure in Fiji [76].  
611 Wound closure percentage shown is calculated by taking the difference between  
612 cell-free areas for t=0h and t=16h and dividing it by t=0h % per well. All data points  
613 were collected over a total of 3 independent experiments.

614

615 ***Permeability imaging assay***

616 BOEC cultures were prepared as described in Orbital Flow Setup section with the  
617 exception of biotinylated gelatin coating replacing rat-tail collagen coat. Biotinylated  
618 gelatin was prepared as described [77] and plates were coated with 10mg/ml of  
619 biotinylated gelatin diluted in 0.1M sodium bicarbonate solution (pH8.3) at 4°C  
620 overnight. Solutions were removed and wells washed with PBS before preparing  
621 cultures as describe in Orbital Flow Setup section. After 24h of rotated/static  
622 incubation, culture plates were left to recover without rotation (for both rotated and



623 static conditions) for 21h in a 5% CO<sub>2</sub>, 37°C, humidified incubator. After which  
624 overlying medium was removed, rinsed with PBS, before staining with 2µg/ml FITC-  
625 Neutravidin (A2662, Thermo Fisher Scientific) for 3mins in a 5% CO<sub>2</sub>, 37°C,  
626 humidified incubator. Stained wells were washed thrice with PBS before they were  
627 fixed with 4% paraformaldehyde phosphate-buffered solution (Nacalai Tesque) for  
628 10mins at room temperature. Fixed cell layers were washed with PBS once before  
629 automated imaging using a 5x objective (CellDiscoverer7) to capture a tiled image of  
630 each entire well. FITC stained areas per well were obtained using ZEN BLUE Image  
631 Analysis tool's interactive Segmentation module. Relative FITC area was determined  
632 by normalizing total area per well against the average area obtained across all  
633 normal BOEC lines used in that experiment. All data points were collected over a  
634 total of 3 independent experiments.

635

### 636 ***Hyaluronidase activity assay***

637 Hyaluronidase activity from rotated conditioned media was measured using an  
638 ELISA-like assay described in Lokeshwar *et al.* (2001) [78] with modifications. As  
639 shown in the graphical workflow (Fig. 5b, top panel), high molecular weight (1.5M-  
640 1.75M) HA (63357, Sigma Aldrich) was coated onto black, clear-bottom 96-well  
641 plates at a concentration of 500µg/ml overnight at 4°C. HA solutions were removed  
642 and wells were washed with PBS twice. Each HA-coated well was incubated with  
643 10µl of conditioned media and 90µl of HAase assay buffer (0.1M sodium formate,  
644 0.15M NaCl, 0.2mg/ml BSA, pH4.2) at 37°C for 24h. Incubation solutions were  
645 removed and wells washed with PBS twice before incubated with 2µg/ml  
646 biotinylated-HABP (PBS, 1% BSA) for 30mins at room temperature. Staining solution

647 was removed and wells washed twice with PBS. PBS was replaced at 100 $\mu$ l per well  
648 before readout at 490nm excitation and 525nm emission (fixed gain of 150) on a  
649 Synergy H1 plate reader (Biotek). Conditioned media from at least 2 independent  
650 experiments per cell line were analyzed and shown.

651

### 652 ***Glycocalyx HA staining***

653 Rotated BOEC cultures were prepared as indicated in Orbital Flow Setup with the  
654 exception of glass-bottom 12-well plates (Cellvis) replacing polypropylene 12-well  
655 plates used in other experiments. Overlying medium was removed and cell  
656 monolayers were briefly but gently washed once with cold sterile PBS once before  
657 fixation with cold methanol for 10mins at -20°C. Fixed cell layers were washed gently  
658 with PBS once before addition of endogenous biotin blocking solutions (Endogenous  
659 Biotin Blocking kit, Thermo Fisher Scientific) according to manufacturer's  
660 instructions. Biotin and avidin-blocked cell layers were then washed with PBS and  
661 stained with 1 $\mu$ g/ml of biotinylated-HABP (versican G1 domain, Affirmus Biosource)  
662 diluted in PBS at 4°C overnight. Cell layers were then washed twice with PBS before  
663 counterstaining with Hoechst 33342 (2 drops per ml, Ready Flow, Thermo Fisher  
664 Scientific) and 20 $\mu$ g/ml FITC-Neutravidin (A2662, Thermo Fisher Scientific) for  
665 30mins. Staining solution was removed and cells washed with PBS before z-stack  
666 imaging using confocal microscopy. Start of z-stacks was determined using Hoechst  
667 33342 signal staining for nuclei and last positions were determined by the last visible  
668 FITC signal per sample. 3 frames per region per cell line were imaged using a 40x  
669 objective. FITC stained areas per frame were obtained and summed across all  
670 stacks using ZEN BLUE Image Analysis tool's interactive Segmentation module.

671

672 ***siRNA knockdown***

673 siRNA against human HYAL1 (ON-TARGETplus SMARTpool, Dharmacon) and a  
674 non-targeting control (ON-TARGETplus NT#4, Dharmacon) were prepared in 1x  
675 siRNA buffer (Dharmacon) according to manufacturer's instructions to give a stock  
676 concentration of 20 $\mu$ M. Employing reverse transfection, siRNA and transfection  
677 reagent (Dharmafect-1, Dharmacon) were first complexed together in serum-free  
678 heparin-free, EGM-2 medium for 20mins at room temperature before adding into  
679 empty, collagen-coated plates. BOECs were then prepared as described in Orbital  
680 Flow Setup and seeded into each well to give a final siRNA concentration of 25 or  
681 50nM and 2.5 $\mu$ l of Dharmafect-1 per well. Experiments proceed as described in  
682 Orbital Flow Setup, Wound Healing Assay or Permeability Imaging Assay.

683

684 ***Confocal and automated microscopy imaging***

685 All confocal imaging were carried out at NTU-Optical Bio-Imaging Centre on an  
686 Inverted Confocal Airyscan Microscope (LSM800, ZEISS) and automated imaging  
687 was carried out on the CellDiscoverer7 (ZEISS).

688

689 ***Statistics***

690 Data analysis (excluding all single-cell RNA sequencing analyses) was performed  
691 with GraphPad Prism version 9.0.2. Data were tested for normality using the  
692 D'Agostino & Pearson test or Shapiro-Wilk test. Where necessary, data that failed  
693 normality tests were log-transformed before statistical analysis. *P* values for data  
694 with a single factor were obtained using a two-tailed *t*-test (parametric) or two-tailed  
695 Mann-Whitney test (non-parametric) as indicated. *P* values for data with 2 factors

696 were assessed using a two-way ANOVA with Tukey's multiple comparisons test. A  
697 value of  $P < 0.05$  was considered statistically significant. Other relevant statistical  
698 considerations have been elaborated in figure legends.

699

700

#### 701 **List of abbreviations**

702 AMD: age-related macular degeneration

703 BOEC: blood outgrowth endothelial cell

704 GWAS: genome-wide association studies

705 iPSC: induced pluripotent stem cell

706 PBMC: peripheral blood mononuclear cell

707 PCV: polypoidal choroidal vasculopathy

708 RPE: retinal pigmented epithelial

709 siRNA: small-interfering RNA

710 VEGF: anti-vascular endothelial growth factor

711

712

713

#### 714 **Declarations**

#### 715 **Ethics Approval**

716 This study was approved by the Local Ethics Committee of SingHealth Centralised  
717 Institutional Review Board (CIRB Refs: R1496 and 2018/2004) and Nanyang  
718 Technological University Singapore Institutional Review Board (IRB-2018-01-026  
719 and IRB-2019-03-011-01).

#### 720 **Consent to participate**

721 Informed consent was obtained from all individual participants included in the study.

722 **Consent for publication**

723 Informed consent was obtained from all individual participants. There is no  
724 personally identifiable information in this article.

725 **Acknowledgements**

726 We thank all patients and healthy donors who have participated in this study. Special  
727 thanks to Ms Kelly Wong Kai Li and Dr Srivani Sistla for coordinating clinical sample  
728 collection, Dr Shyam Prabhakar and Dr Samydurai Sudhagar for advice on 10x  
729 Genomics single cell library preparations, Dr Balakrishnan Kannan for his guidance  
730 in confocal and widefield microscopy imaging, A/Prof Yusuf Ali and his team for the  
731 lending of laboratory space to run Seahorse Analyzer experiments, Dr Anthony Siau  
732 for helping with experimental optimization, and LKCMedicine Research  
733 Administration and Support Services for their assistance.

734 **Funding**

735 The team from Nanyang Technological University Singapore was funded by the  
736 Nanyang Assistant Professorship and Academic Research Fund Tier 2 grant  
737 (MOE2018-T2-1-042) from the Ministry of Education, Singapore. N.J.Y.Y is  
738 supported by the Nanyang President's Graduate Scholarship. C.C. and C.M.G.C.  
739 were funded by the SERI-IMCB Program in Retinal Angiogenic Diseases (SIPRAD)  
740 grant (SPF2014/002) from Agency for Science, Technology and Research,  
741 Singapore. X.S. is funded by a grant (CRP21-2018-00103) from the National  
742 Research Foundation (Singapore) on Human Umbilical Cord-Lining Derived Induced  
743 Pluripotent Stem Cells (CLiPS) as a Universal Source of Cells for Neurosensory  
744 Disorders.

745

746

747 **Author contributions**

748 Conceptualization: CC

749 Data curation: KXW, NJYY, CYN, FWJC, FQ

750 Formal analysis: KXW, NJYY, CC

751 Investigation: KXW, NJYY, CYN, FWJC, FQ

752 Methodology: KXW, NJYY, CYN, FWJC, FQ, XFT, YBX, GN, HMT

753 Resources: CC, CMGC, HWH

754 Validation: KXW, NJYY

755 Visualization: KXW, NJYY, CYN, CC

756 Funding acquisition: CC, CMGC, XS

757 Project administration: CC, CMGC

758 Supervision: CC, CMGC, XS, NRD, HWH

759 Writing – original draft: KXW, CC

760 Writing – review & editing: All authors

761 All authors approved the manuscript.

762

763 **Conflict of interest statement**

764 The authors have declared that no conflict of interest exists.

765

766 **Availability of Data and Materials**

767 Further information and requests for resources and reagents should be directed to

768 and will be fulfilled by the lead contact, Christine Cheung (ccheung@ntu.edu.sg).

769 Most materials used in this study are commercially procured. There are restrictions

770 to the availability of blood outgrowth endothelial cell lines derived from human

771 patients and normal donors due to ethics considerations for use of these materials

772 within the current scope of study. Requests can be made to the lead contact as we  
773 will explore use of materials subject to new ethics approval and research  
774 collaboration agreement (including material transfer).

775 The authors declare that all data supporting the findings of this study are available  
776 within the paper and supplemental information that includes original data of western  
777 blots. Specifically, single-cell sequencing (scRNA-seq) dataset that support the  
778 findings of this study are available upon request from the corresponding author or  
779 will be available in public repository when this manuscript is published at refereed  
780 journal.

781

782

783

784

785

786

787

788

789

790

791

792

793

794

795

796

## 797 References

- 798 1. Wong RL, Lai TY: **Polypoidal choroidal vasculopathy: an update on therapeutic**  
799 **approaches.** *J Ophthalmic Vis Res* 2013, **8**(4):359-371.
- 800 2. Yuzawa M, Mori R, Kawamura A: **The origins of polypoidal choroidal vasculopathy.**  
801 *Br J Ophthalmol* 2005, **89**(5):602-607.
- 802 3. Yannuzzi LA, Wong DWK, Sforzolini BS, Goldbaum M, Tang KC, Spaide RF, Freund KB,  
803 Slakter JS, Guyer DR, Sorenson JA *et al*: **Polypoidal Choroidal Vasculopathy and**  
804 **Neovascularized Age-related Macular Degeneration.** *Archives of Ophthalmology*  
805 1999, **117**(11):1503-1510.
- 806 4. Yannuzzi LA, Sorenson J, Spaide RF, Lipson B: **Idiopathic polypoidal choroidal**  
807 **vasculopathy (IPCV).** *Retina* 1990, **10**(1):1-8.
- 808 5. Cheung CMG, Lai TY, Ruamviboonsuk P, Chen S-J, Chen Y, Freund KB, Gomi F, Koh  
809 AH, Lee W-K, Wong TY: **Polypoidal choroidal vasculopathy: definition,**  
810 **pathogenesis, diagnosis, and management.** *Ophthalmology* 2018, **125**(5):708-724.
- 811 6. Japanese Study Group of Polypoidal Choroidal Vasculopathy: **Criteria for diagnosis of**  
812 **polypoidal choroidal vasculopathy.** *Nippon Ganka Gakkai Zasshi* 2005, **109**(7):417.
- 813 7. Lim T, Laude A, Tan C: **Polypoidal choroidal vasculopathy: an angiographic**  
814 **discussion.** *Eye* 2010, **24**(3):483.
- 815 8. Kumar A, Kumawat D, Sundar MD, Gagrani M, Gupta B, Roop P, Hasan N, Sharma A,  
816 Chawla R: **Polypoidal choroidal vasculopathy: a comprehensive clinical update.**  
817 *Ther Adv Ophthalmol* 2019, **11**:2515841419831152.
- 818 9. Tsujikawa A, Sasahara M, Otani A, Gotoh N, Kameda T, Iwama D, Yodoi Y, Tamura H,  
819 Mandai M, Yoshimura N: **Pigment epithelial detachment in polypoidal choroidal**  
820 **vasculopathy.** *American journal of ophthalmology* 2007, **143**(1):102-111.
- 821 10. Dansingani KK, Balaratnasingam C, Naysan J, Freund KB: **En Face Imaging of**  
822 **Pachychoroid Spectrum Disorders with Swept-Source Optical Coherence**  
823 **Tomography.** *Retina* 2016, **36**(3):499-516.
- 824 11. Lorentzen TD, Subhi Y, Sorensen TL: **PREVALENCE OF POLYPOIDAL CHOROIDAL**  
825 **VASCULOPATHY IN WHITE PATIENTS WITH EXUDATIVE AGE-RELATED MACULAR**  
826 **DEGENERATION: Systematic Review and Meta-Analysis.** *Retina* 2018, **38**(12):2363-  
827 2371.
- 828 12. Coscas G, Yamashiro K, Coscas F, De Benedetto U, Tsujikawa A, Miyake M, Gemmy  
829 Cheung CM, Wong TY, Yoshimura N: **Comparison of exudative age-related macular**  
830 **degeneration subtypes in Japanese and French Patients: multicenter diagnosis with**  
831 **multimodal imaging.** *American journal of ophthalmology* 2014, **158**(2):309-318  
832 e302.
- 833 13. Imamura Y, Engelbert M, Iida T, Freund KB, Yannuzzi LA: **Polypoidal choroidal**  
834 **vasculopathy: a review.** *Surv Ophthalmol* 2010, **55**(6):501-515.
- 835 14. Chen H, Liu K, Chen LJ, Hou P, Chen W, Pang CP: **Genetic associations in polypoidal**  
836 **choroidal vasculopathy: a systematic review and meta-analysis.** *Mol Vis* 2012,  
837 **18**:816-829.
- 838 15. Fritsche LG, Igl W, Bailey JN, Grassmann F, Sengupta S, Bragg-Gresham JL, Burdon KP,  
839 Hebring SJ, Wen C, Gorski M *et al*: **A large genome-wide association study of age-**  
840 **related macular degeneration highlights contributions of rare and common**  
841 **variants.** *Nat Genet* 2016, **48**(2):134-143.
- 842 16. Liang XY, Lai TY, Liu DT, Fan AH, Chen LJ, Tam PO, Chiang SW, Ng TK, Lam DS, Pang  
843 CP: **Differentiation of exudative age-related macular degeneration and polypoidal**



- 844 **choroidal vasculopathy in the ARMS2/HTRA1 locus. *Invest Ophthalmol Vis Sci* 2012,**  
845 **53(6):3175-3182.**
- 846 17. Yanagisawa S, Kondo N, Miki A, Matsumiya W, Kusuhara S, Tsukahara Y, Honda S,  
847 Negi A: **Difference between age-related macular degeneration and polypoidal**  
848 **choroidal vasculopathy in the hereditary contribution of the A69S variant of the**  
849 **age-related maculopathy susceptibility 2 gene (ARMS2). *Molecular Vision* 2011,**  
850 **17(383-85):3574-3582.**
- 851 18. Ng TK, Liang XY, Lai TY, Ma L, Tam PO, Wang JX, Chen LJ, Chen H, Pang CP: **HTRA1**  
852 **promoter variant differentiates polypoidal choroidal vasculopathy from exudative**  
853 **age-related macular degeneration. *Sci Rep* 2016, 6:28639.**
- 854 19. Fleckenstein M, Keenan TDL, Guymer RH, Chakravarthy U, Schmitz-Valckenberg S,  
855 Klaver CC, Wong WT, Chew EY: **Age-related macular degeneration. *Nat Rev Dis***  
856 **Primers 2021, 7(1):31.**
- 857 20. Rebhun CB, Moulton EM, Novais EA, Moreira-Neto C, Ploner SB, Louzada RN, Lee B,  
858 Baumal CR, Fujimoto JG, Duker JS *et al*: **Polypoidal Choroidal Vasculopathy on**  
859 **Swept-Source Optical Coherence Tomography Angiography with Variable Interscan**  
860 **Time Analysis. *Translational Vision Science & Technology* 2017, 6(6):4-4.**
- 861 21. Wang M, Zhou Y, Gao SS, Liu W, Huang Y, Huang D, Jia Y: **Evaluating Polypoidal**  
862 **Choroidal Vasculopathy With Optical Coherence Tomography Angiography.**  
863 ***Investigative Ophthalmology & Visual Science* 2016, 57(9):OCT526-OCT532.**
- 864 22. Volland S, Esteve-Rudd J, Hoo J, Yee C, Williams DS: **A comparison of some**  
865 **organizational characteristics of the mouse central retina and the human macula.**  
866 ***PLoS One* 2015, 10(4):e0125631.**
- 867 23. Marmorstein AD, Marmorstein LY: **The challenge of modeling macular degeneration**  
868 **in mice. *Trends Genet* 2007, 23(5):225-231.**
- 869 24. Tobe T, Ortega S, Luna JD, Ozaki H, Okamoto N, Derevjani NL, Vinoses SA, Basilico C,  
870 Campochiaro PA: **Targeted disruption of the FGF2 gene does not prevent choroidal**  
871 **neovascularization in a murine model. *Am J Pathol* 1998, 153(5):1641-1646.**
- 872 25. Hebbel RP: **Blood endothelial cells: utility from ambiguity. *The Journal of clinical***  
873 **investigation 2017, 127(5):1613-1615.**
- 874 26. Yoder MC, Mead LE, Prater D, Krier TR, Mroueh KN, Li F, Krasich R, Temm CJ, Prchal  
875 JT, Ingram DA: **Redefining endothelial progenitor cells via clonal analysis and**  
876 **hematopoietic stem/progenitor cell principals. *Blood* 2007, 109(5):1801-1809.**
- 877 27. Medina RJ, O'Neill CL, Sweeney M, Guduric-Fuchs J, Gardiner TA, Simpson DA, Stitt  
878 AW: **Molecular analysis of endothelial progenitor cell (EPC) subtypes reveals two**  
879 **distinct cell populations with different identities. *BMC medical genomics* 2010,**  
880 **3(1):18.**
- 881 28. Lin Y, Weisdorf DJ, Solovey A, Hebbel RP: **Origins of circulating endothelial cells and**  
882 **endothelial outgrowth from blood. *The Journal of clinical investigation* 2000,**  
883 **105(1):71-77.**
- 884 29. Hur J, Yoon C-H, Kim H-S, Choi J-H, Kang H-J, Hwang K-K, Oh B-H, Lee M-M, Park Y-B:  
885 **Characterization of two types of endothelial progenitor cells and their different**  
886 **contributions to neovasclogenesis. *Arteriosclerosis, thrombosis, and vascular***  
887 **biology 2004, 24(2):288-293.**
- 888 30. Paschalaki KE, Randi AM: **Recent Advances in Endothelial Colony Forming Cells**  
889 **Toward Their Use in Clinical Translation. *Frontiers in Medicine* 2018, 5(295).**

- 890 31. Givens C, Tzima E: **Endothelial Mechanosignaling: Does One Sensor Fit All?**  
891 *Antioxidants & Redox Signaling* 2016, **25**(7):373-388.
- 892 32. Ormiston ML, Toshner MR, Kiskin FN, Huang CJ, Groves E, Morrell NW, Rana AA:  
893 **Generation and Culture of Blood Outgrowth Endothelial Cells from Human**  
894 **Peripheral Blood.** *J Vis Exp* 2015(106):e53384.
- 895 33. Yeo NJY, Chan EJJ, Cheung C: **Choroidal Neovascularization: Mechanisms of**  
896 **Endothelial Dysfunction.** *Front Pharmacol* 2019, **10**:1363-1363.
- 897 34. Foltz LP, Clegg DO: **Rapid, Directed Differentiation of Retinal Pigment Epithelial**  
898 **Cells from Human Embryonic or Induced Pluripotent Stem Cells.** *J Vis Exp*  
899 2017(128).
- 900 35. Warboys CM, Ghim M, Weinberg PD: **Understanding mechanobiology in cultured**  
901 **endothelium: A review of the orbital shaker method.** *Atherosclerosis* 2019,  
902 **285**:170-177.
- 903 36. Dardik A, Chen L, Frattini J, Asada H, Aziz F, Kudo FA, Sumpio BE: **Differential effects**  
904 **of orbital and laminar shear stress on endothelial cells.** *J Vasc Surg* 2005, **41**(5):869-  
905 880.
- 906 37. Ley K, Lundgren E, Berger E, Arfors KE: **Shear-dependent inhibition of granulocyte**  
907 **adhesion to cultured endothelium by dextran sulfate.** *Blood* 1989, **73**(5):1324-1330.
- 908 38. Scheitlin CG, Nair DM, Crestanello JA, Zweier JL, Alevriadou BR: **Fluid Mechanical**  
909 **Forces and Endothelial Mitochondria: A Bioengineering Perspective.** *Cell Mol*  
910 *Bioeng* 2014, **7**(4):483-496.
- 911 39. Sun RJ, Muller S, Stoltz JF, Wang X: **Shear stress induces caveolin-1 translocation in**  
912 **cultured endothelial cells.** *Eur Biophys J* 2002, **30**(8):605-611.
- 913 40. Ashburner M, Ball CA, Blake JA, Botstein D, Butler H, Cherry JM, Davis AP, Dolinski K,  
914 Dwight SS, Eppig JT *et al*: **Gene ontology: tool for the unification of biology. The**  
915 **Gene Ontology Consortium.** *Nat Genet* 2000, **25**(1):25-29.
- 916 41. Gene Ontology C: **The Gene Ontology resource: enriching a GOld mine.** *Nucleic*  
917 *Acids Res* 2021, **49**(D1):D325-D334.
- 918 42. Jassal B, Matthews L, Viteri G, Gong C, Lorente P, Fabregat A, Sidiropoulos K, Cook J,  
919 Gillespie M, Haw R *et al*: **The reactome pathway knowledgebase.** *Nucleic Acids Res*  
920 2020, **48**(D1):D498-D503.
- 921 43. Kanehisa M, Goto S: **KEGG: kyoto encyclopedia of genes and genomes.** *Nucleic Acids*  
922 *Res* 2000, **28**(1):27-30.
- 923 44. Subramanian A, Tamayo P, Mootha VK, Mukherjee S, Ebert BL, Gillette MA,  
924 Paulovich A, Pomeroy SL, Golub TR, Lander ES *et al*: **Gene set enrichment analysis: a**  
925 **knowledge-based approach for interpreting genome-wide expression profiles.** *Proc*  
926 *Natl Acad Sci U S A* 2005, **102**(43):15545-15550.
- 927 45. Ajami NE, Gupta S, Maurya MR, Nguyen P, Li JY, Shyy JY, Chen Z, Chien S,  
928 Subramaniam S: **Systems biology analysis of longitudinal functional response of**  
929 **endothelial cells to shear stress.** *Proc Natl Acad Sci U S A* 2017, **114**(41):10990-  
930 10995.
- 931 46. Tarbell JM, Pahakis MY: **Mechanotransduction and the glycocalyx.** *J Intern Med*  
932 2006, **259**(4):339-350.
- 933 47. Fu BM, Tarbell JM: **Mechano-sensing and transduction by endothelial surface**  
934 **glycocalyx: composition, structure, and function.** *Wiley Interdiscip Rev Syst Biol Med*  
935 2013, **5**(3):381-390.

- 936 48. Xanthis I, Souilhol C, Serbanovic-Canic J, Roddie H, Kalli AC, Fragiadaki M, Wong R,  
937 Shah DR, Askari JA, Canham L *et al*: **beta1 integrin is a sensor of blood flow**  
938 **direction**. *J Cell Sci* 2019, **132**(11).
- 939 49. Bourguignon V, Flamion B: **Respective roles of hyaluronidases 1 and 2 in**  
940 **endogenous hyaluronan turnover**. *FASEB J* 2016, **30**(6):2108-2114.
- 941 50. Puissant E, Gilis F, Dogne S, Flamion B, Jadot M, Boonen M: **Subcellular trafficking**  
942 **and activity of Hyal-1 and its processed forms in murine macrophages**. *Traffic* 2014,  
943 **15**(5):500-515.
- 944 51. Gasingirwa MC, Thirion J, Mertens-Strijthagen J, Wattiaux-De Coninck S, Flamion B,  
945 Wattiaux R, Jadot M: **Endocytosis of hyaluronidase-1 by the liver**. *Biochem J* 2010,  
946 **430**(2):305-313.
- 947 52. Parmar KM, Larman HB, Dai G, Zhang Y, Wang ET, Moorthy SN, Kratz JR, Lin Z, Jain  
948 MK, Gimbrone MA, Jr. *et al*: **Integration of flow-dependent endothelial phenotypes**  
949 **by Kruppel-like factor 2**. *J Clin Invest* 2006, **116**(1):49-58.
- 950 53. Atkins GB, Jain MK: **Role of Kruppel-like transcription factors in endothelial biology**.  
951 *Circ Res* 2007, **100**(12):1686-1695.
- 952 54. Yanagi Y, Foo VHX, Yoshida A: **Asian age-related macular degeneration: from basic**  
953 **science research perspective**. *Eye* 2019, **33**(1):34-49.
- 954 55. Henry CB, Duling BR: **Permeation of the luminal capillary glycocalyx is determined**  
955 **by hyaluronan**. *Am J Physiol* 1999, **277**(2):H508-514.
- 956 56. Vink H, Duling BR: **Capillary endothelial surface layer selectively reduces plasma**  
957 **solute distribution volume**. *Am J Physiol Heart Circ Physiol* 2000, **278**(1):H285-289.
- 958 57. Patel KD, Nollert MU, McEver RP: **P-selectin must extend a sufficient length from**  
959 **the plasma membrane to mediate rolling of neutrophils**. *J Cell Biol* 1995, **131**(6 Pt  
960 2):1893-1902.
- 961 58. Reitsma S, Slaaf DW, Vink H, van Zandvoort MA, oude Egbrink MG: **The endothelial**  
962 **glycocalyx: composition, functions, and visualization**. *Pflugers Arch* 2007,  
963 **454**(3):345-359.
- 964 59. Tarbell JM, Weinbaum S, Kamm RD: **Cellular fluid mechanics and**  
965 **mechanotransduction**. *Ann Biomed Eng* 2005, **33**(12):1719-1723.
- 966 60. Florian JA, Kosky JR, Ainslie K, Pang Z, Dull RO, Tarbell JM: **Heparan sulfate**  
967 **proteoglycan is a mechanosensor on endothelial cells**. *Circ Res* 2003, **93**(10):e136-  
968 142.
- 969 61. Mochizuki S, Vink H, Hiramatsu O, Kajita T, Shigeto F, Spaan JA, Kajiya F: **Role of**  
970 **hyaluronic acid glycosaminoglycans in shear-induced endothelium-derived nitric**  
971 **oxide release**. *Am J Physiol Heart Circ Physiol* 2003, **285**(2):H722-726.
- 972 62. Gouverneur M, Spaan JA, Pannekoek H, Fontijn RD, Vink H: **Fluid shear stress**  
973 **stimulates incorporation of hyaluronan into endothelial cell glycocalyx**. *Am J*  
974 *Physiol Heart Circ Physiol* 2006, **290**(1):H458-452.
- 975 63. Afify AM, Stern M, Guntenhoner M, Stern R: **Purification and characterization of**  
976 **human serum hyaluronidase**. *Arch Biochem Biophys* 1993, **305**(2):434-441.
- 977 64. Frost GI, Csoka AB, Wong T, Stern R: **Purification, cloning, and expression of human**  
978 **plasma hyaluronidase**. *Biochem Biophys Res Commun* 1997, **236**(1):10-15.
- 979 65. Zhu GZ, Sun ZS, Liao WX, Cai B, Chen CL, Zheng HH, Zeng L, Luo SK: **Efficacy of**  
980 **Retrobulbar Hyaluronidase Injection for Vision Loss Resulting from Hyaluronic Acid**  
981 **Filler Embolization**. *Aesthet Surg J* 2017, **38**(1):12-22.

- 982 66. Cavallini M, Gazzola R, Metalla M, Vaianti L: **The role of hyaluronidase in the**  
983 **treatment of complications from hyaluronic acid dermal fillers.** *Aesthet Surg J* 2013,  
984 **33(8):1167-1174.**
- 985 67. Lin CY, Kolliopoulos C, Huang CH, Tenhunen J, Heldin CH, Chen YH, Heldin P: **High**  
986 **levels of serum hyaluronan is an early predictor of dengue warning signs and**  
987 **perturbs vascular integrity.** *EBioMedicine* 2019, **48:425-441.**
- 988 68. Dogne S, Rath G, Jouret F, Caron N, Dessy C, Flamion B: **Hyaluronidase 1 Deficiency**  
989 **Preserves Endothelial Function and Glycocalyx Integrity in Early Streptozotocin-**  
990 **Induced Diabetes.** *Diabetes* 2016, **65(9):2742-2753.**
- 991 69. Green WR, Enger C: **Age-related macular degeneration histopathologic studies. The**  
992 **1992 Lorenz E. Zimmerman Lecture.** *Ophthalmology* 1993, **100(10):1519-1535.**
- 993 70. Pang X, Li W, Landwehr E, Yuan Y, Wang W, Azevedo HS: **Mimicking the endothelial**  
994 **glycocalyx through the supramolecular presentation of hyaluronan on patterned**  
995 **surfaces.** *Faraday Discuss* 2019, **219(0):168-182.**
- 996 71. Nakatsu MN, Davis J, Hughes CC: **Optimized fibrin gel bead assay for the study of**  
997 **angiogenesis.** *J Vis Exp* 2007(3):186.
- 998 72. Stuart T, Butler A, Hoffman P, Hafemeister C, Papalexi E, Mauck WM, 3rd, Hao Y,  
999 Stoeckius M, Smibert P, Satija R: **Comprehensive Integration of Single-Cell Data.** *Cell*  
1000 2019, **177(7):1888-1902 e1821.**
- 1001 73. Lukowski SW, Patel J, Andersen SB, Sim SL, Wong HY, Tay J, Winkler I, Powell JE,  
1002 Khosrotehrani K: **Single-Cell Transcriptional Profiling of Aortic Endothelium**  
1003 **Identifies a Hierarchy from Endovascular Progenitors to Differentiated Cells.** *Cell*  
1004 *Rep* 2019, **27(9):2748-2758 e2743.**
- 1005 74. Finak G, McDavid A, Yajima M, Deng J, Gersuk V, Shalek AK, Slichter CK, Miller HW,  
1006 McElrath MJ, Prlic M *et al*: **MAST: a flexible statistical framework for assessing**  
1007 **transcriptional changes and characterizing heterogeneity in single-cell RNA**  
1008 **sequencing data.** *Genome Biol* 2015, **16:278.**
- 1009 75. Yu G, Wang LG, Han Y, He QY: **clusterProfiler: an R package for comparing biological**  
1010 **themes among gene clusters.** *OMICS* 2012, **16(5):284-287.**
- 1011 76. Schindelin J, Arganda-Carreras I, Frise E, Kaynig V, Longair M, Pietzsch T, Preibisch S,  
1012 Rueden C, Saalfeld S, Schmid B *et al*: **Fiji: an open-source platform for biological-**  
1013 **image analysis.** *Nat Methods* 2012, **9(7):676-682.**
- 1014 77. Dubrovskiy O, Birukova AA, Birukov KG: **Measurement of local permeability at**  
1015 **subcellular level in cell models of agonist- and ventilator-induced lung injury.** *Lab*  
1016 *Invest* 2013, **93(2):254-263.**
- 1017 78. Lokeshwar VB, Rubinowicz D, Schroeder GL, Forgacs E, Minna JD, Block NL, Nadjji M,  
1018 Lokeshwar BL: **Stromal and epithelial expression of tumor markers hyaluronic acid**  
1019 **and HYAL1 hyaluronidase in prostate cancer.** *J Biol Chem* 2001, **276(15):11922-**  
1020 **11932.**

1022  
1023

1024



## Figures and figure legends

### Figure 1

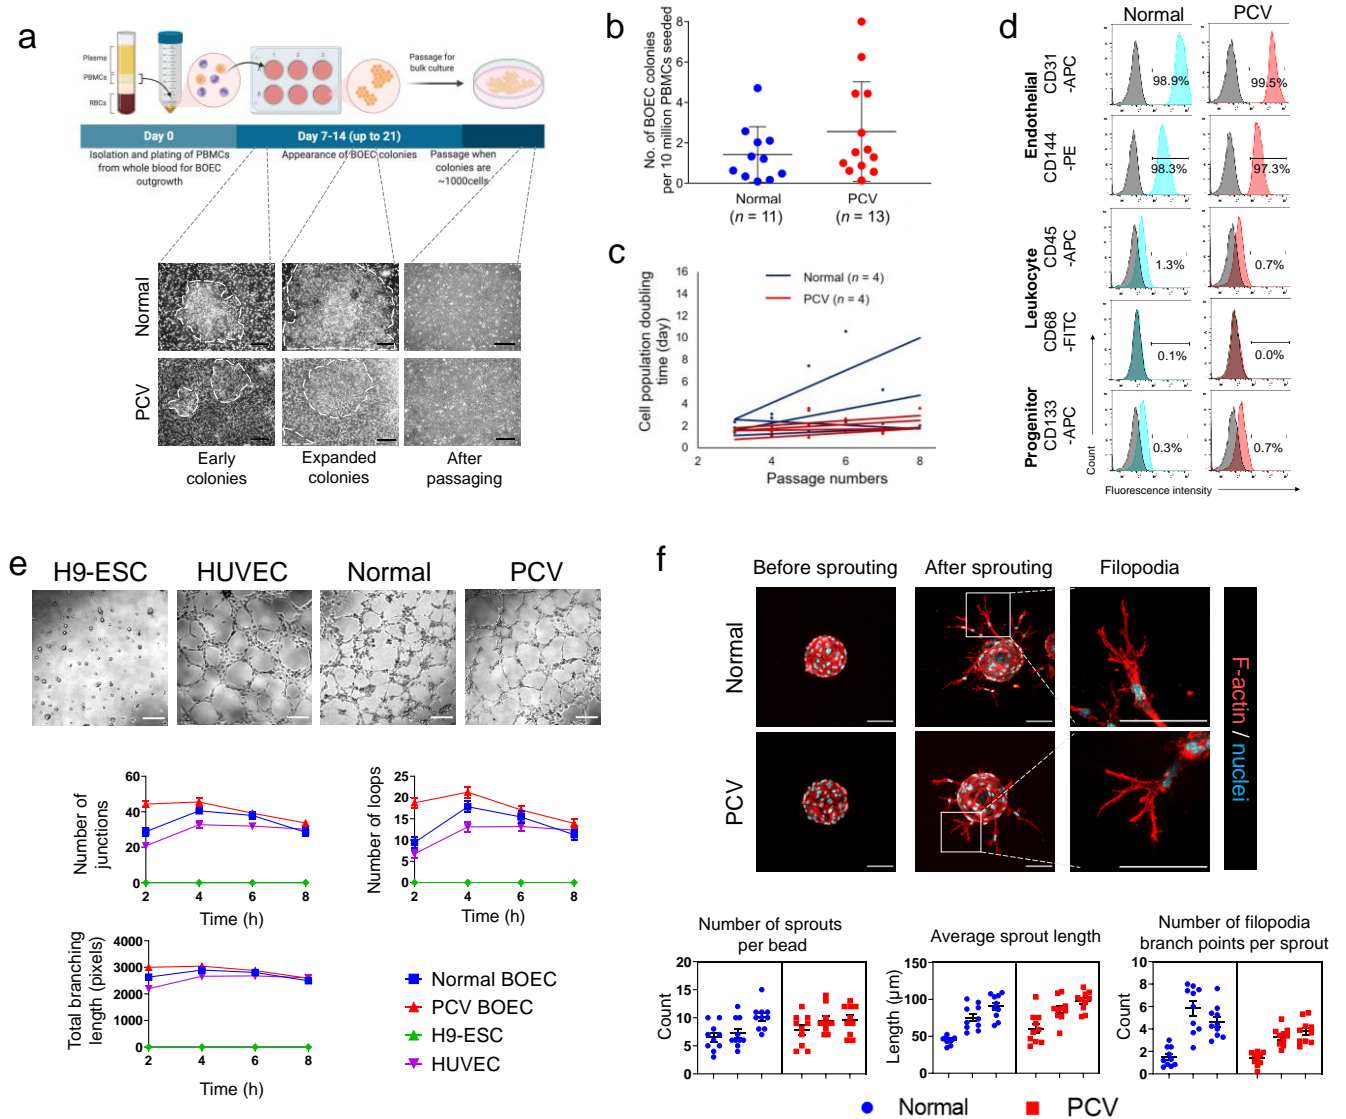

### Figure 1: Derivation and characterization of human blood outgrowth

**endothelial cells. (a)** Workflow illustrating the generation of BOECs. Images show

BOEC colonies emerging during days 7-14 post-seeding of PBMCs, followed by

characteristic cobblestone-like endothelial cells after passaging of colonies (scale

bar, 100  $\mu$ m). **(b)** Number of BOEC colonies per million PBMCs obtained from

normal controls and PCV patients. **(c)** Proliferation dynamics of BOEC lines

measured by cell doubling duration over passages. **(d)** Flow cytometry characterization of BOECs for endothelial, leukocyte and progenitor cell markers (grey - isotype control; red/blue – cell lineage marker staining). **(e)** Tube formation assay with representative images of tube formation ability of BOECs at 4h. Bottom panel shows quantification of junctions, loops (tubes) and total branching length (total length of loops and branches) over time (quantified from  $n=12$  optical fields per timepoint from each cell line). H9-stem cells (H9-ESC) and HUVECs are negative and positive controls for tube formation, respectively. Data are mean  $\pm$  s.e.m. Scale bars, 200  $\mu\text{m}$ . **(f)** Fibrin gel bead sprouting assay of BOECs at 24h. BOECs were immunostained for F-actin (red) and DAPI (cyan). Bottom panel shows measurements of relevant sprouting parameters (quantified from  $n=10$  beads from each individual, BOECs from 3 PCV and 3 normal individuals). Data are mean  $\pm$  s.e.m. Scale bars, 100  $\mu\text{m}$ .

**Figure 2**

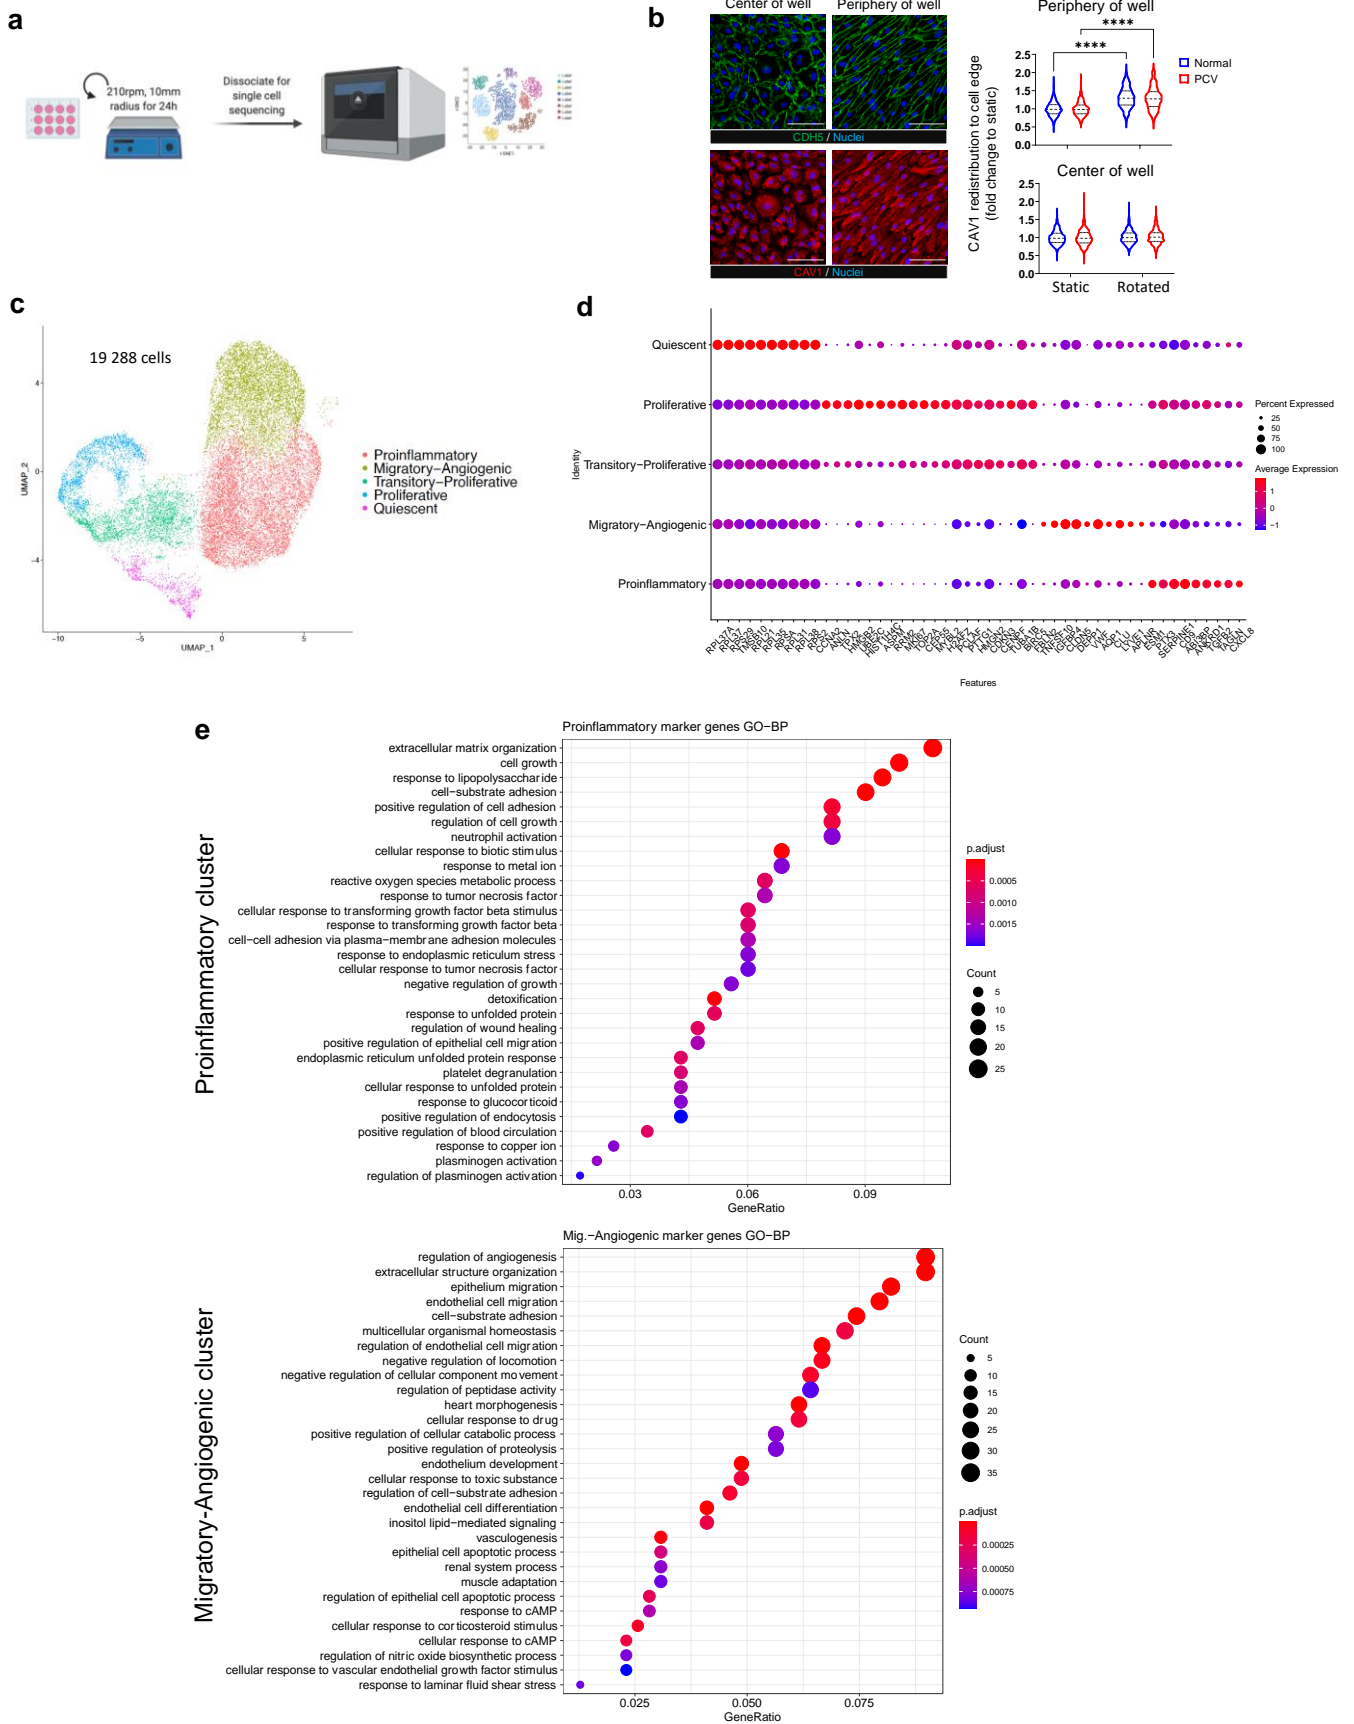

**Figure 2: Single-cell RNA sequencing reveals different cell states after**

**exposure to heterogeneous flow. (a)** Workflow showing orbital flow setup used on PCV and normal BOEC lines prior to dissociation for scRNA sequencing. **(b)** CDH5 (green) and CAV1 (red) immunostainings reveal patterns of heterogeneous flow in the setup. Nuclei were stained with DAPI (blue). Right panel shows measurements of CAV1 intracellular re-distribution as an indicator of flow response (BOECs from 4 PCV and 3 normal individuals). Data shown are normalized to individual static conditions with median and quartiles indicated.  $p$  values were obtained using two-way ANOVA with Tukey's multiple comparisons test. \*\*\*\* $p < 0.0001$ . Scale bar, 100  $\mu\text{m}$ . **(c)** Single-cell UMAP showing sequenced cells for all subjects ( $n = 19,288$  cells, BOECs from 2 PCV and 2 normal individuals). We identified 5 distinct transcriptomic cell states across the integrated dataset, 1) Proinflammatory, 2) Migratory-Angiogenic, 3) Transitory-Proliferative, 4) Proliferative and 5) Quiescent cells. **(d)** Gene expression of top 10 positive markers genes for each of the cell states shown in **(c)**. **(e)** Gene set enrichment analysis against GO (Biological processes) database of marker genes for two largest clusters shown here ranked by Bonferroni corrected  $p$ -values.



## Figure 3

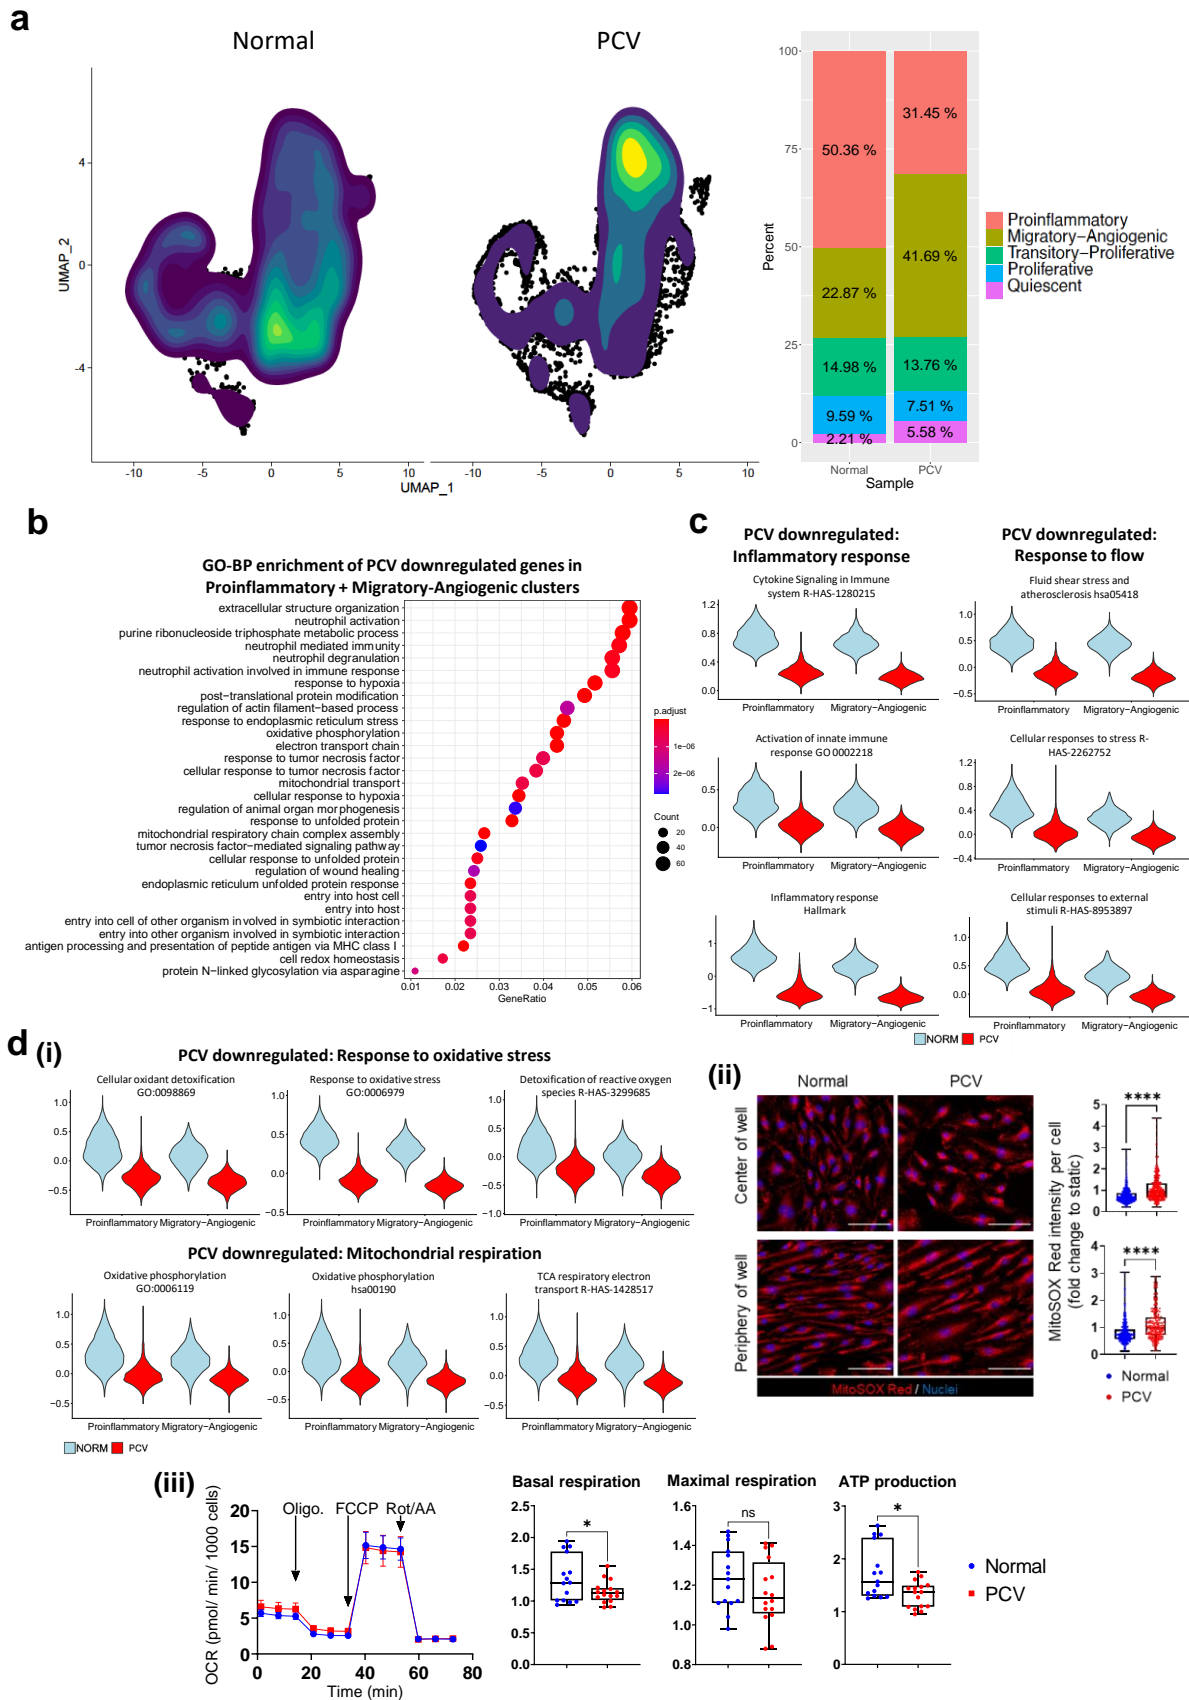

**Figure 3: PCV endothelial cells show attenuated response to heterogeneous**

**flow. (a)** Contour plot overlays on UMAPs of normal and PCV samples showing the density distribution of sequenced cells across all clusters. Right panel shows the percentage breakdown of cells per cell state for normal and PCV samples. **(b)** Differential expression analysis was carried out comparing PCV and normal cells in the Proinflammatory and Migratory-angiogenic cell states. Gene set enrichment analysis against GO (Biological processes) database reveals enriched processes from PCV downregulated genes shown here ranked by Bonferroni corrected  $p$ -values. **(c)** Gene set enrichment analyses of PCV downregulated genes in these clusters were expanded to include Reactome, KEGG and MSigDB databases. Significantly enriched pathways or processes (adj.  $p < 0.01$ ) are shown here as violin plots that represent calculated module scores for the gene sets indicated. **(d) (i)** Module scores of PCV and normal cells for significantly enriched oxidative stress response and mitochondrial respiration gene sets (adj.  $p < 0.01$ ) are shown as violin plots here. **(ii)** MitoSOX Red staining of PCV and normal BOECs after 24h of heterogeneous flow. Nuclei were stained DAPI (blue). Right panel shows intensity per cell measurements of MitoSOX Red staining ( $n > 1,000$  cells analyzed per group, BOECs from 2 PCV and 2 normal individuals). Data shown are normalized to individual static conditions with median and quartiles indicated.  $P$  values were from two-tailed Mann Whitney test . \*\*\*\* $p < 0.0001$ . Scale bar, 100  $\mu\text{m}$ . **(iii)** Mitochondrial function assay of BOECs after 24h of heterogeneous flow. Left panel shows oxygen consumption rate (OCR) of BOECs in response to oligomycin (Oligo.), carbonyl cyanide-4 (trifluoromethoxy) phenylhydrazone (FCCP) and rotenone/ antimycin A (Rot/AA). Right panel shows measurements per well of basal respiration, maximal respiration and mitochondrial ATP production (BOECs from 4 PCV and 3 normal individuals). Data shown are normalized to individual static conditions with median

and quartiles indicated. *P* values for basal respiration and maximal respiration were from two-tailed *t* tests with Welch's correction and for ATP production from two-tailed Mann-Whitney test, \**p*<0.05.

## Figure 4

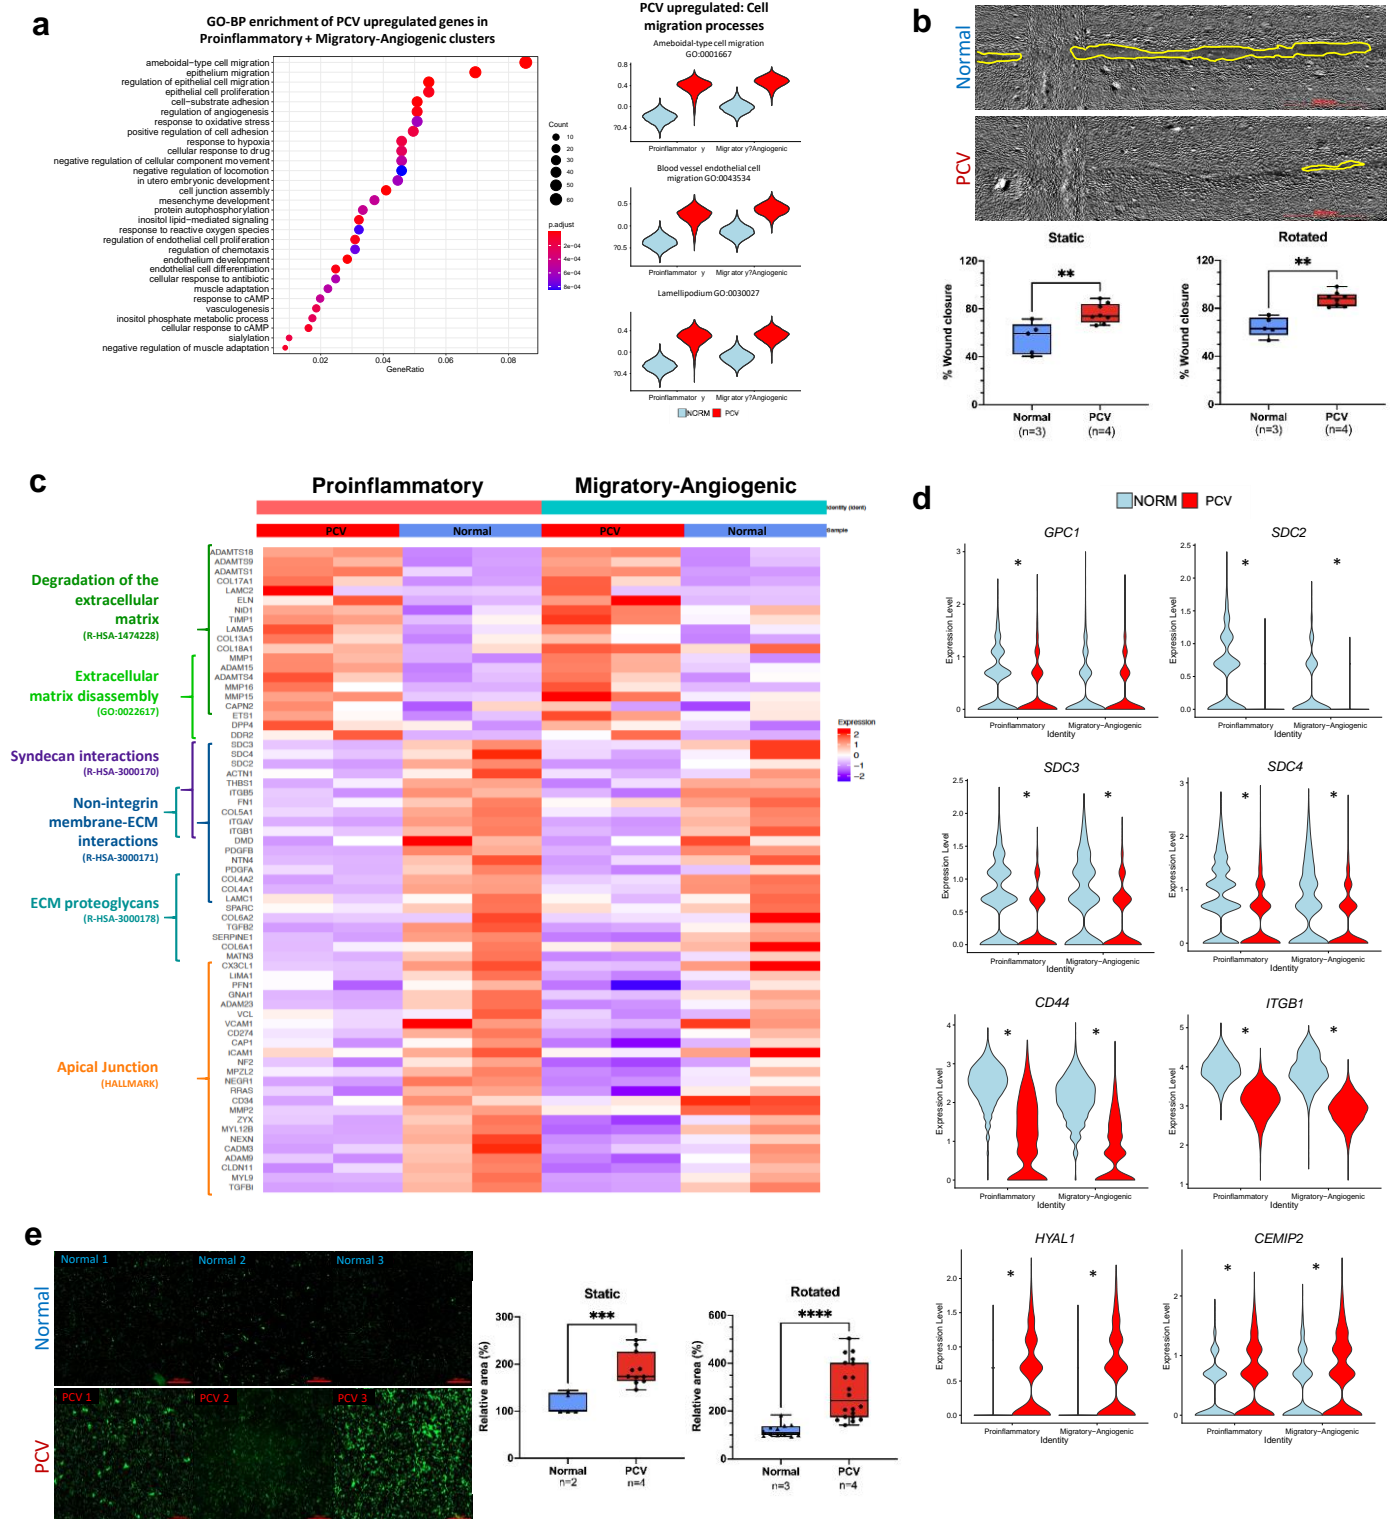

**Figure 4: Phenotypic characterization of migratory capacity and barrier permeability in PCV endothelial cells. (a)** Gene set enrichment analysis against Gene Ontology (Biological processes) database reveals enriched processes from

PCV upregulated genes shown here ranked by Bonferroni corrected  $p$ -values. Right panel shows violin plots that represent calculated module scores for the processes indicated. **(b)** Wound healing assays carried out to assess migratory capacity of BOECs 21h post-scratch after 24h of static or rotated (heterogeneous flow) culture. Left panel shows representative images from heterogeneous flow condition with yellow outlines indicating cell-free wound regions after 21h, scale bar, 2000 $\mu$ m. Box and whiskers plots showing median with minimum and maximum.  $n$  indicates number of cell lines evaluated for each group while  $p$ -value is from two-tailed t-test, \*\*  $p < 0.01$ . **(c)** Heatmap showing average expression of cells from each individual BOEC sample in the indicated cell states. **(d)** Violin plots of glyocalyx-related genes found to be significantly differentially expressed between PCV and normal BOECs, \*adj.  $p < 0.01$ . **(e)** *In vitro* vascular permeability imaging assay using biotinylated-gelatin coated surfaces. Intracellular gaps were revealed by Neutraavidin-FITC staining after 24h of static or rotated (heterogeneous flow) culture. Shown are representative frames from different BOEC lines, scale bar, 200 $\mu$ m. Box and whiskers plots showing median with minimum and maximum. Area was normalized against average FITC area of normal BOEC lines.  $n$  indicates number of cell lines evaluated for each group while  $p$ -value is from two-tailed t-test, \*\*\*  $p < 0.001$ , \*\*\*\*  $p < 0.0001$ .

## Figure 5

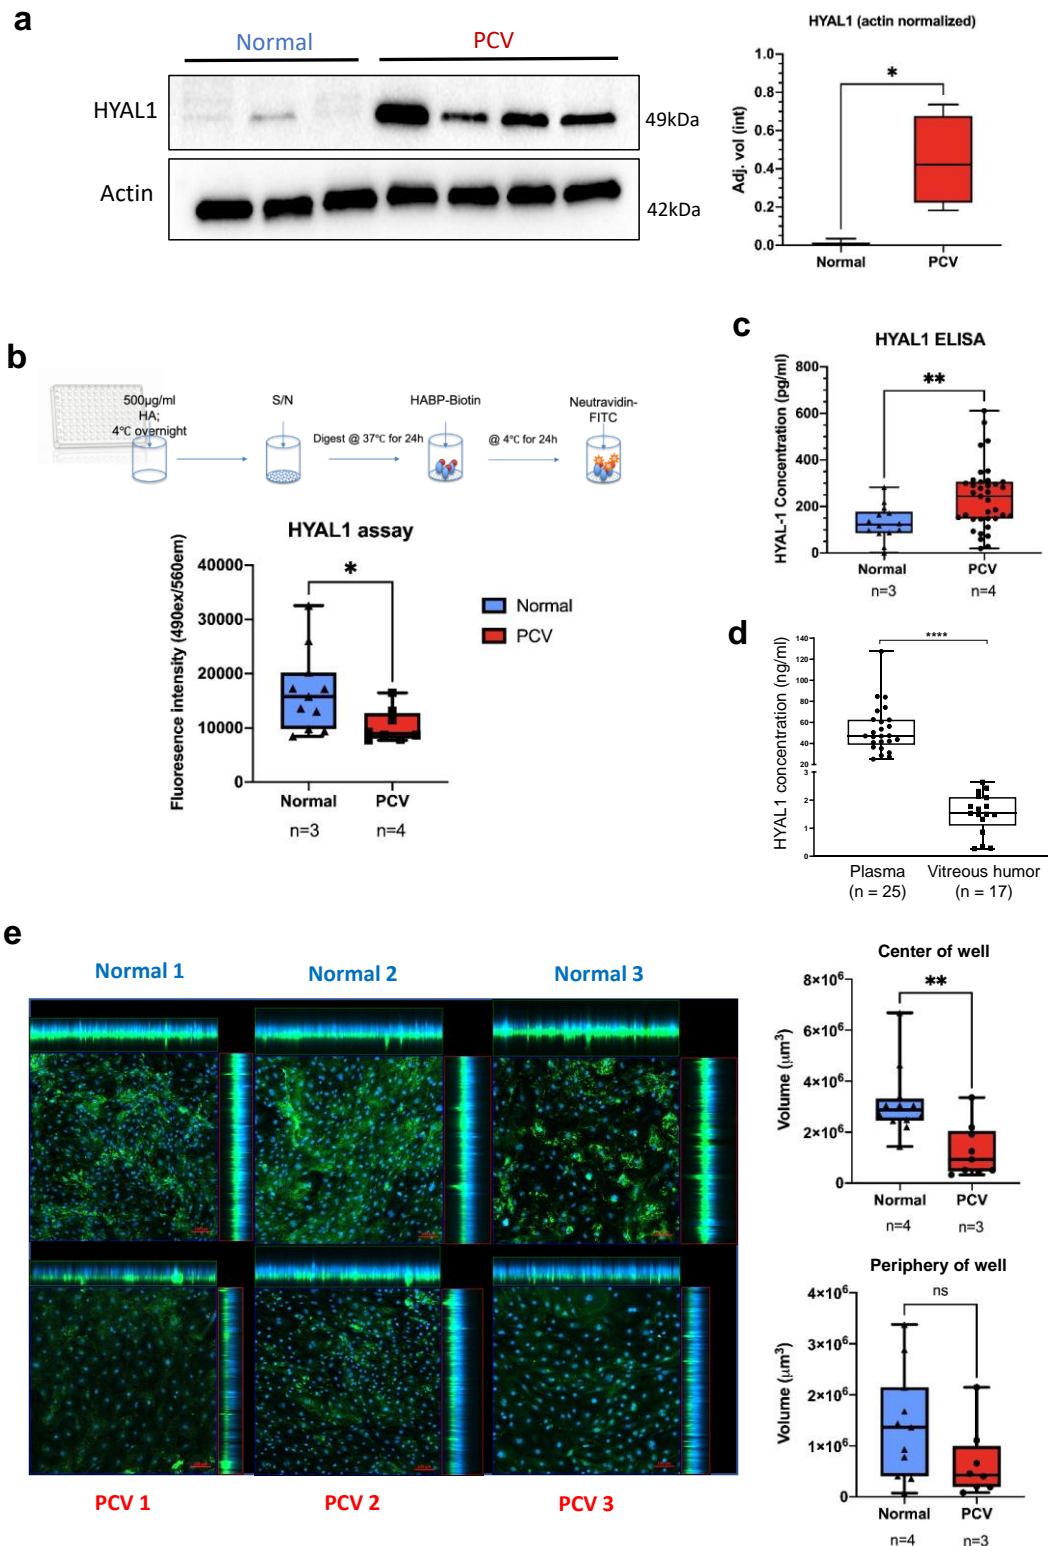

**Figure 5: HYAL1 enzymatic activities and perturbation of glyocalyx**

**hyaluronan in PCV endothelial cells. (a)** Western blot analyses of cell lysates from 4 PCV and 3 normal BOEC lines, subjected to 24h of heterogeneous flow, showing



HYAL1 detection at 51kDa and Actin as the loading control at 42kDa. Right panel shows densitometric quantification of HYAL1 bands normalized against Actin. Box and whiskers plots showing median with minimum and maximum.  $p$ -value is from two-tailed t test, \*  $p < 0.05$ . **(b)** Enzymatic activity of HYAL1 was evaluated according to the workflow illustrated in the upper panel. Conditioned media (S/N, supernatant) was obtained from BOEC cultures rotated for 24h. Box and whiskers plots showing median with minimum and maximum.  $n$  indicates number of cell lines evaluated for each group while  $p$ -value is from two-tailed t-test, \*  $p < 0.05$ . **(c)** ELISA was used to detect HYAL1 in BOEC conditioned media after 24h heterogeneous flow. Box and whiskers plot shows median with minimum and maximum.  $n$  indicates number of cell lines evaluated for each group while  $p$ -value from two-tailed Mann-Whitney test, \*\*  $p < 0.01$ . **(d)** ELISA detection of HYAL1 in PCV patient plasma and vitreous humor. Box and whiskers plot shows median with minimum and maximum. Every point represents an average of duplicates or triplicates of an individual patient.  $n$  indicates number of patients evaluated for each group while  $p$ -value from two-tailed Mann-Whitney test, \*\*\*\*  $p < 0.0001$ . **(e)** HA in the glycocalyx was detected using biotinylated HABP before detection with FITC-Neutraavidin (green). Nuclei were stained blue with DAPI. Left panel shows maximal intensity projections of representative frames from each cell line evaluated. Cell were subjected to heterogeneous flow for 24h before cold methanol fixation and staining. Three image frames were taken for each well region. Right panel shows total HA-stained areas summed across z-stacks per image frame. Stacks were taken to the point of last visible FITC signal in each frame. Box and whiskers plot showing median with minimum and maximum.  $n$  indicates number of cell lines evaluated for each group while  $p$ -value is from two-tailed t test, \*\*  $p < 0.01$ .



## Figure 6

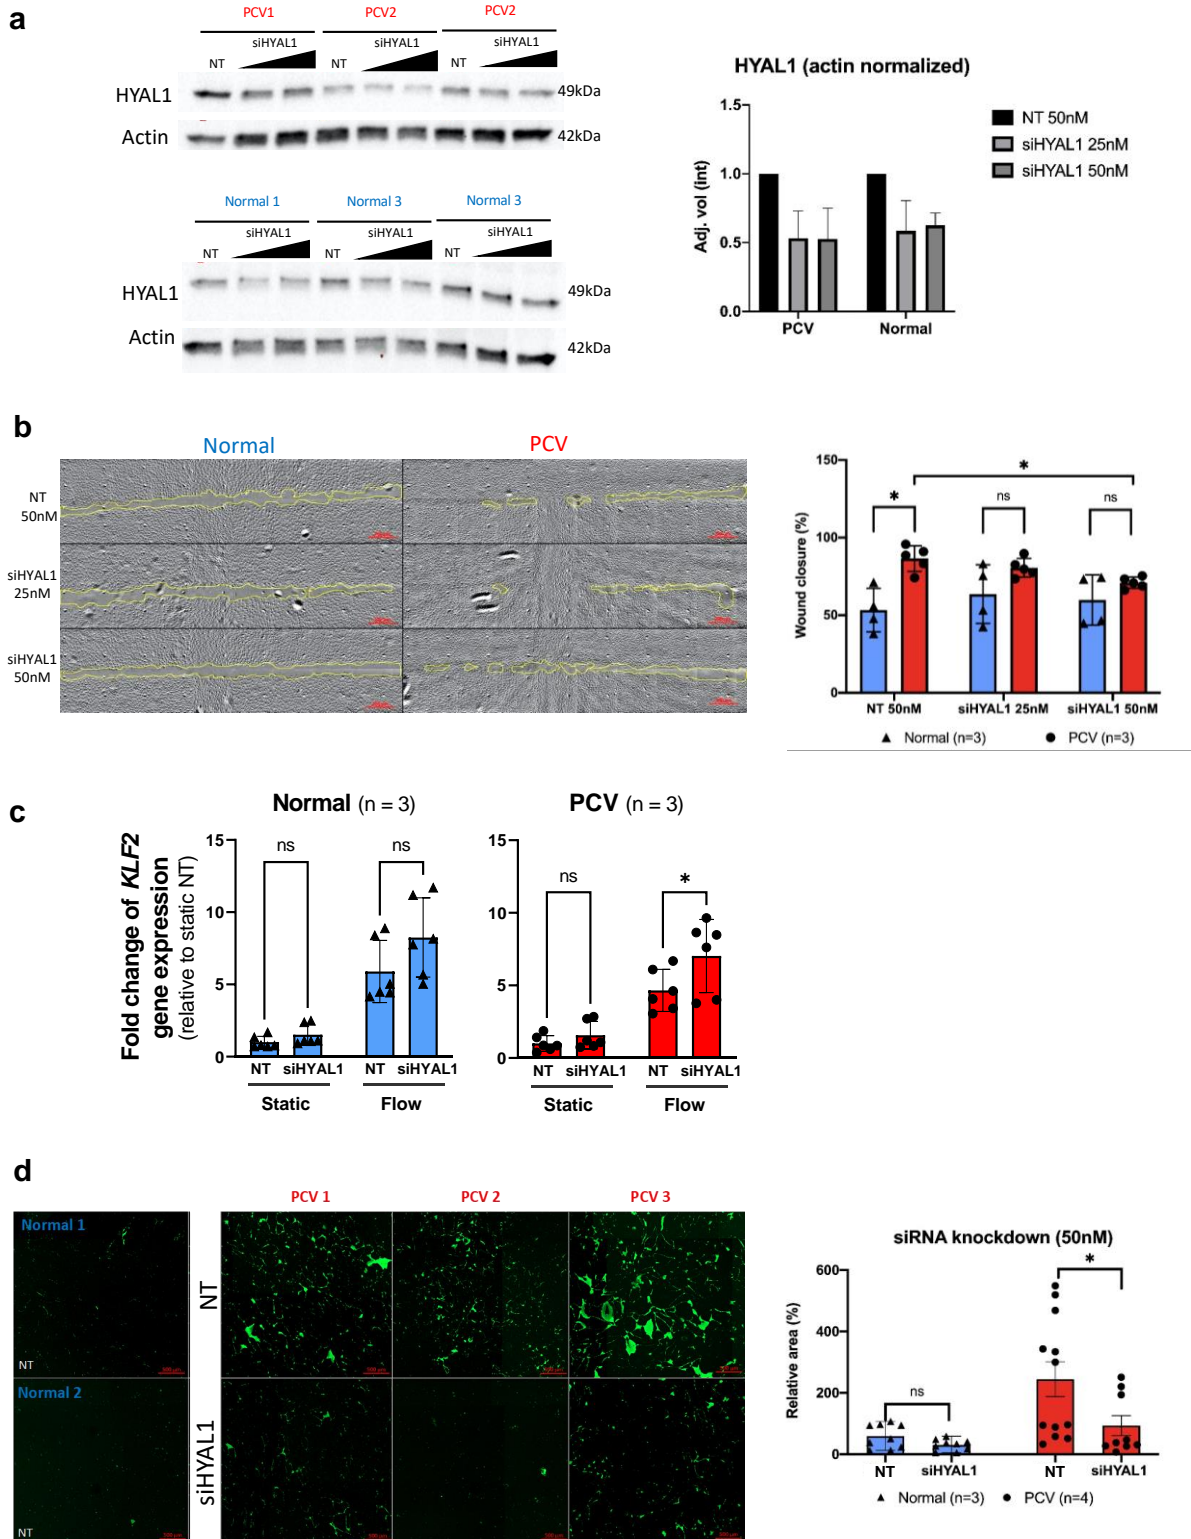

treatment. Cell lysates were harvested and analyzed for HYAL1 levels. Bar graphs show mean actin-normalized HYAL1 band intensities with error bars representing standard deviations (siHYAL1, short-interfering RNA of *HYAL1*; NT, non-targeting siRNA). **(b)** Wound healing assays were carried out to assess migratory capacity of BOECs at 21h post-scratch after 24h of static or rotated culture. siRNA knockdown was carried out 48h prior to orbital rotation. Top panel shows representative image set from the flow condition with yellow outlines indicating cell-free wound regions at 21h post-scratch, scale bar, 200 $\mu$ m. **(c)** Relative *KLF2* gene expressions in BOECs in static condition and after 6 hours of heterogeneous flow exposure, with treatment of either NT or siHYAL1. **(d)** *In vitro* vascular permeability imaging assay using biotinylated-gelatin coated surfaces. Intercellular gaps were revealed by Neutraavidin-FITC staining after 24h of static or rotated culture. siRNA knockdown was carried out 48h prior to orbital rotation. Shown are representative frames from different BOEC lines, scale bar, 500 $\mu$ m. Area was normalized against average FITC area of normal BOEC lines. All bar graphs showing means with standard deviations. *n* indicates number of cell lines evaluated for each group while *p*-value is from two-tailed t-test, \**p*<0.05.

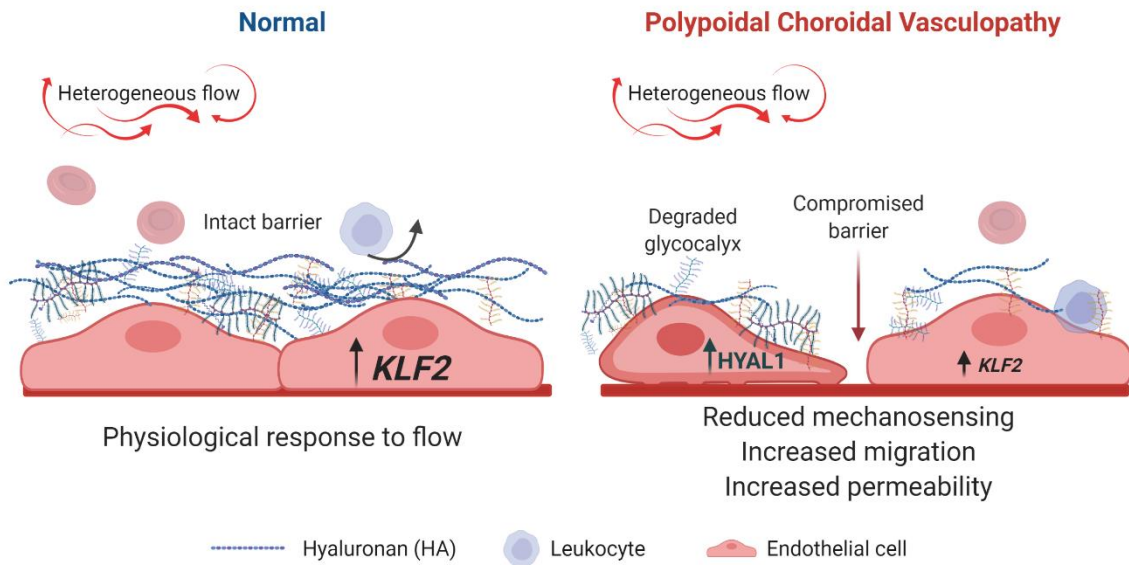

**Figure 7: Increased expression of hyaluronidase-1 drives endothelial abnormalities in PCV.** Phenotypes indicative of vascular instability were observed in PCV patient-derived endothelial cells under heterogeneous flow conditions. Increased HYAL1 expression in PCV cells led to impaired glyocalyx through the degradation of HA components, giving rise to an altered response to flow, increased cell migration and barrier permeability.

## Supplemental Figure S1

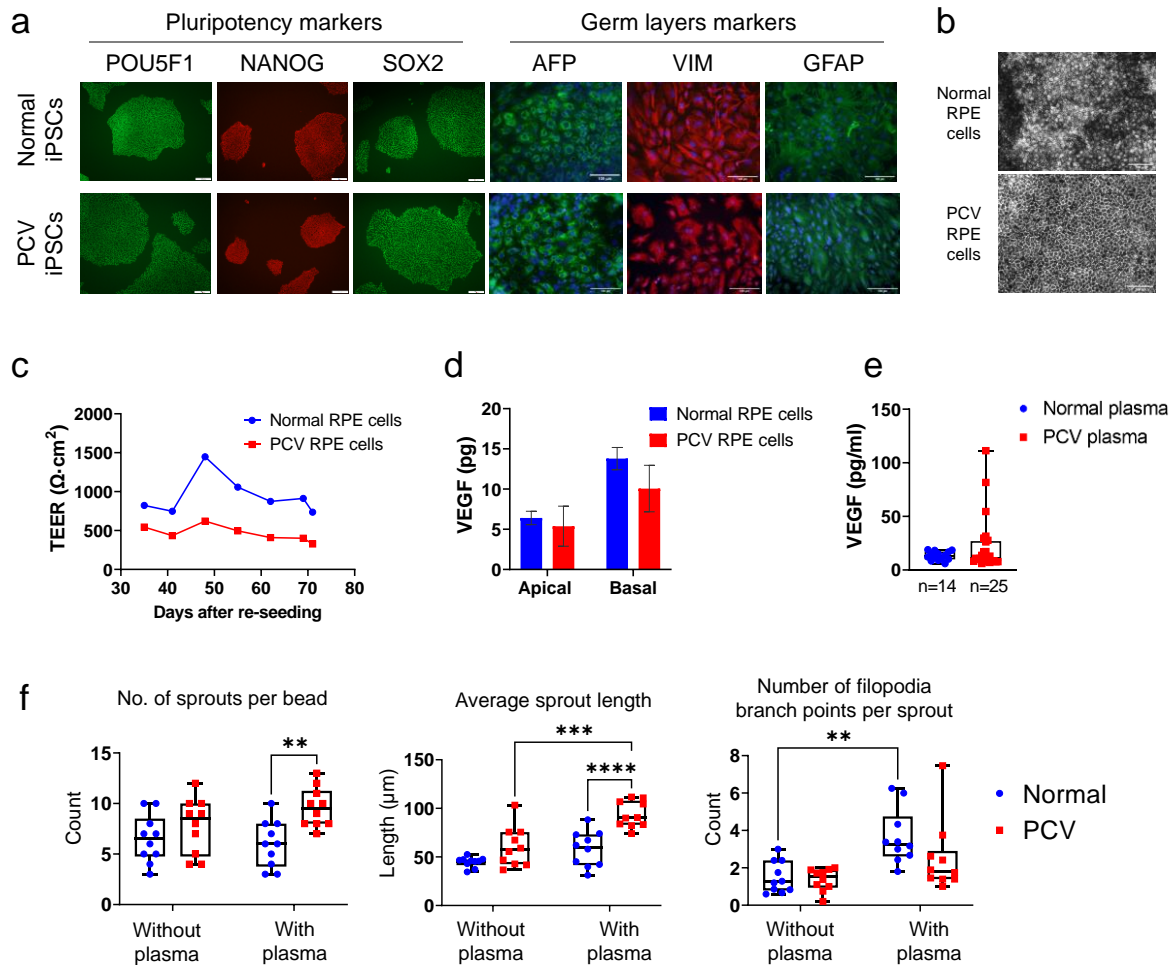

**Supplemental Figure S1: Extrinsic mediators influence sprouting angiogenesis of BOECs.** (a) Representative images of immunostaining for pluripotency and germ layer markers on PCV and normal donor-derived iPSCs. Scale bar, 100  $\mu\text{m}$ . (b) RPE cells differentiated from PCV and normal donors developed pigment from day 34. Scale bar, 100  $\mu\text{m}$ . (c) Transepithelial electrical resistance (TEER) assay on iPSC-RPE cells between 34-71 days post-seeding onto transwells to establish RPE polarity. Ave  $\Omega$  of each RPE cell line was calculated from 3 independent transwells, 3 TEER readings/ transwell. (d) ELISA measurement of VEGF in conditioned media collected from the apical and basal compartments in RPE cell transwell cultures. Conditioned media of 4 PCV and 4 normal iPSC-RPE cell lines were analysed at day 86 of differentiation. (e) ELISA measurement of VEGF from plasma samples of 25 PCV and 14 normal donors. Statistical tests were assessed using two-tailed t-tests with Welch's correction but no significant differences between Normal and PCV were observed. (f) BOECs were coated onto microcarrier beads and allowed to sprout either in standard culture media (EGM-2 with 10% heat-inactivated FBS) or media containing isogenic patient plasma (EGM-2 with 10% plasma) for 24 hours in a fibrin sprouting assay. Quantification of number of sprouts per bead, average sprout length and number of filopodia branch points per sprout was performed using Imaris; n = 10 beads per donor cell line. Data are presented as box and whiskers plots showing the median, minimum, maximum and quartiles of each group. P values between individual groups were obtained using two-way ANOVA with Tukey's multiple comparisons test. \*\* $P < 0.01$ , \*\*\* $P > 0.001$ .



## Supplemental Figure S2

a

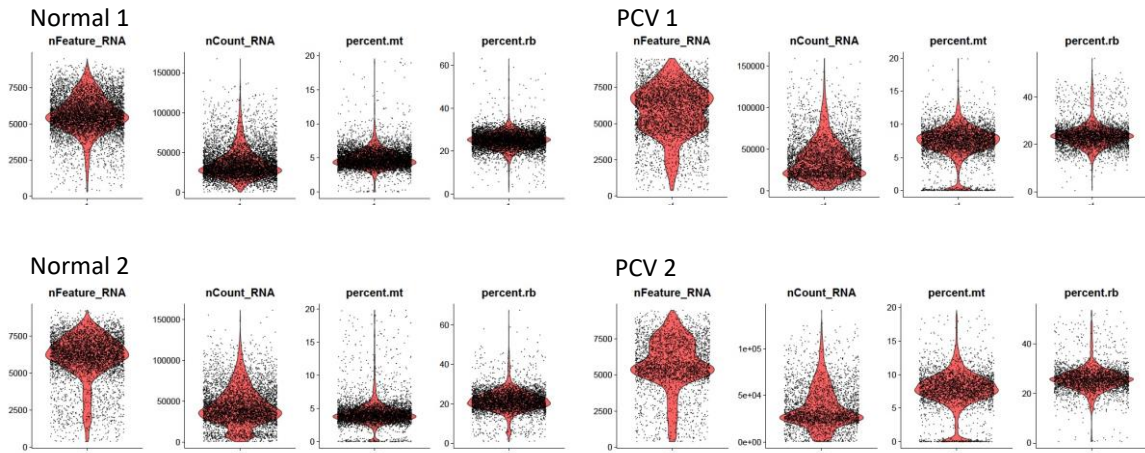

b

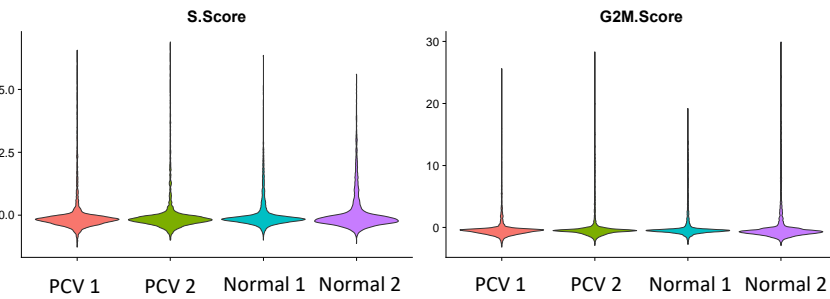

c

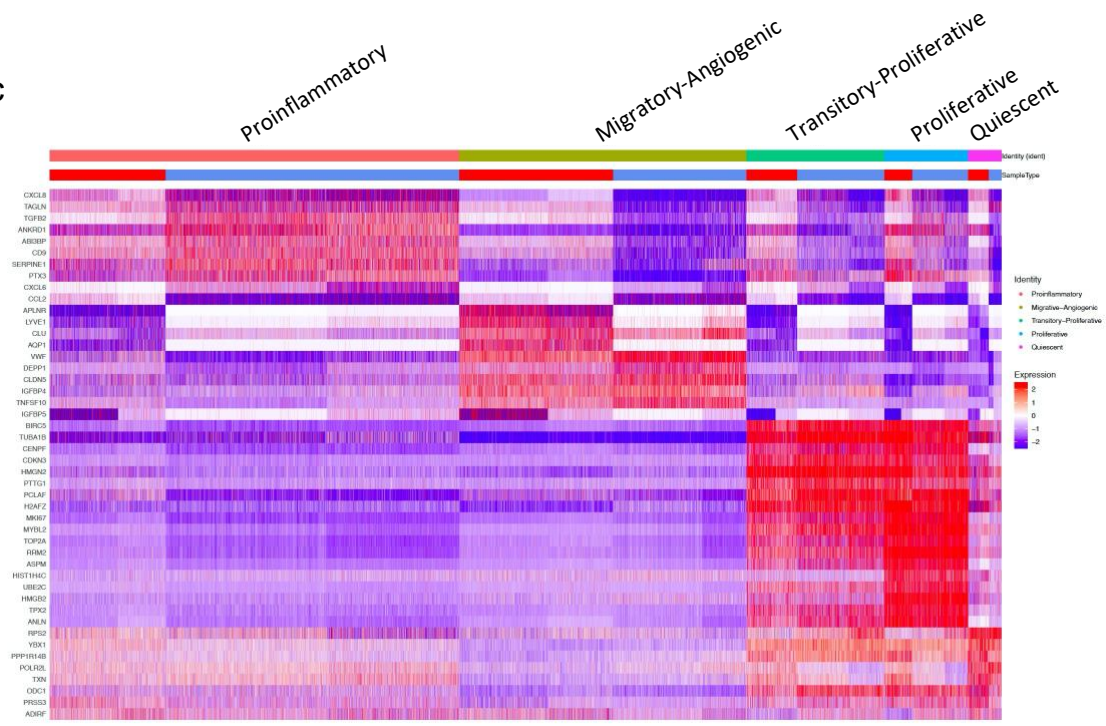

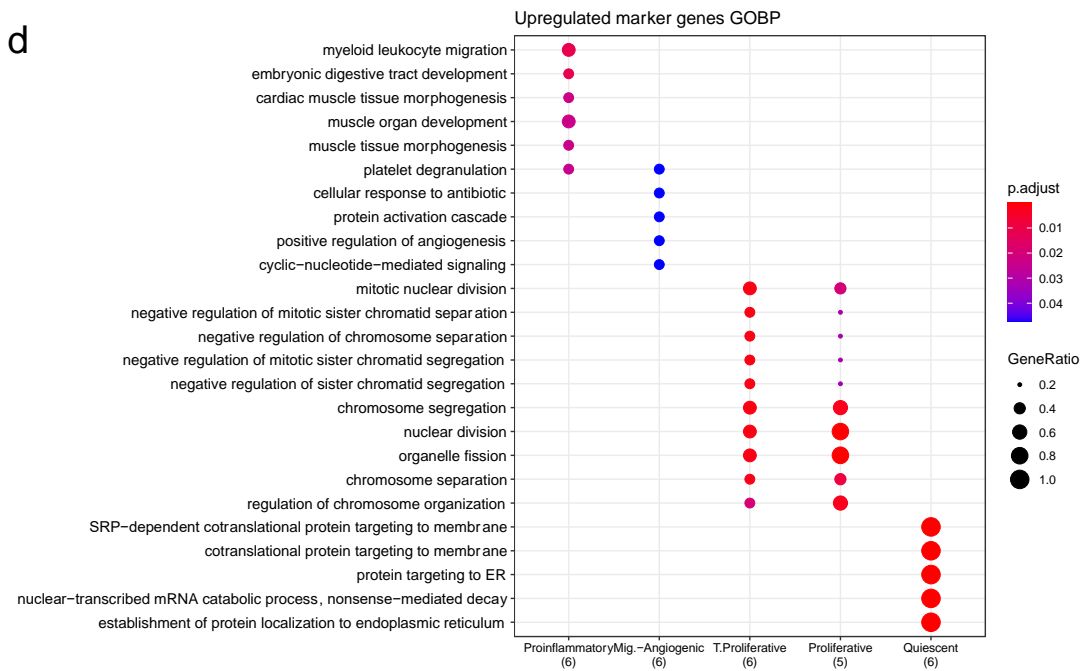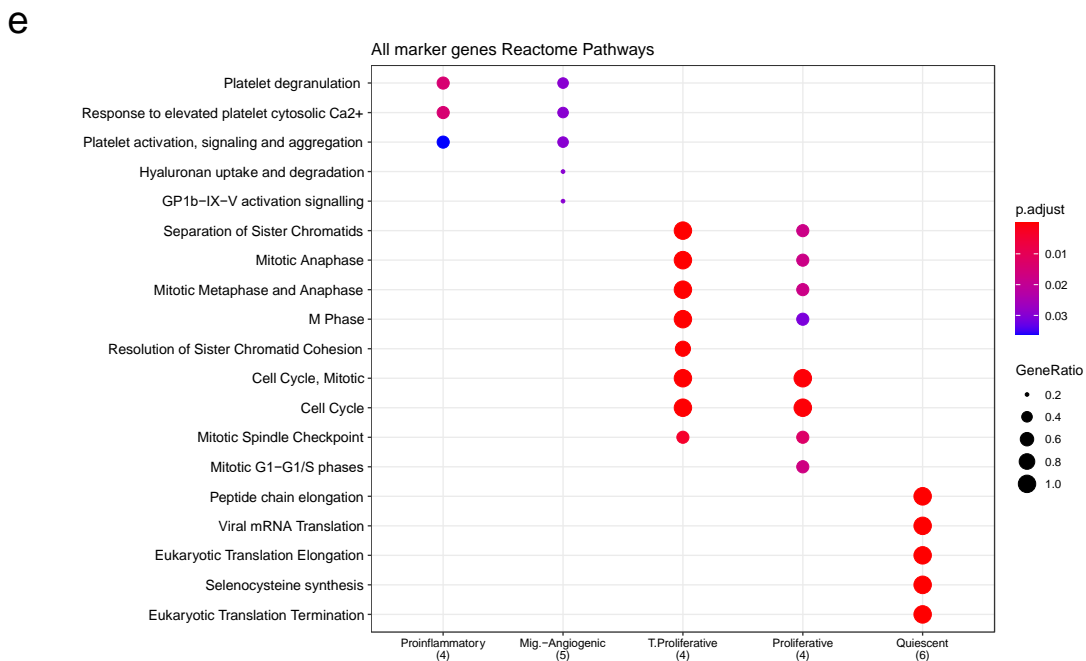

**Supplemental Figure S2: scRNA-seq data quality checks and cluster marker enrichments.** (a) Violin plots with dots representing individual cells for the number of features, number of counts, percentage of mitochondrial genes (mt) and percentage of ribosomal genes (rb) found in each individual library (b) Violin plots showing expression scores for S-phase and G2M genes in each individual library. (c) Heatmap showing expression of top 10 marker genes for each clusters at the single cell level. Dotplots of the top unique gene sets, GOBP in (d) and Reactome in (e), enriched for the upregulated marker genes of each identified cluster shown here ranked by Bonferroni corrected  $p$ -values. Right panel shows violin plots that represent calculated module scores for the processes indicated.

## Supplemental Figure S3

a

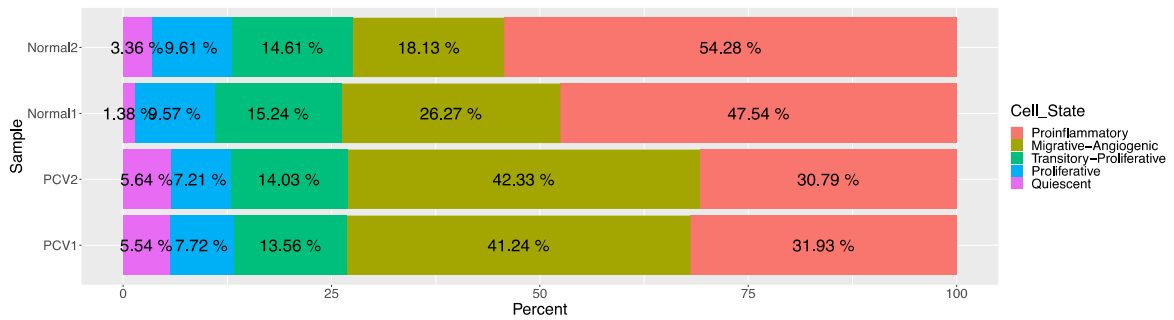

b

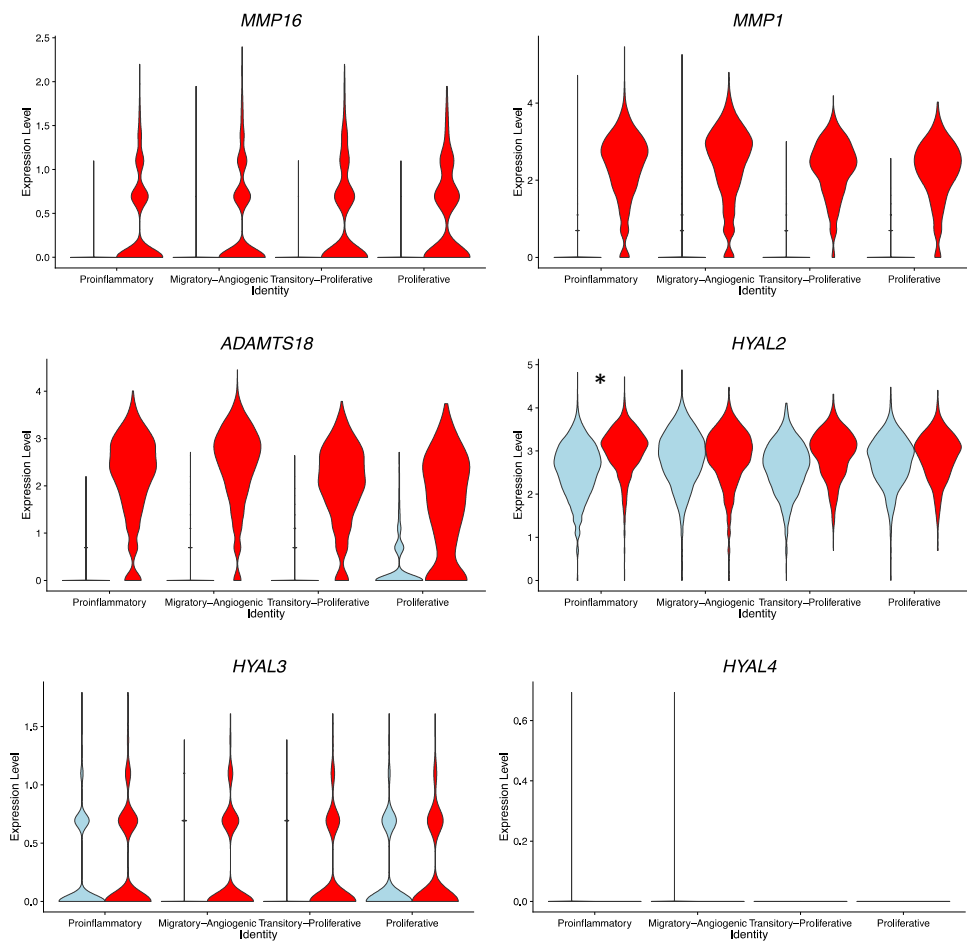

**Supplemental Figure S3: Differential expression in PCV and normal BOECs after orbital flow. (a)** Percentage breakdown of cells per cell state for individual PCV and normal libraries. **(b)** Violin plots showing differential expression of ECM-modifying genes and other hyaluronidases detected in the study, \*adj.  $p < 0.01$ .



**Supplemental Table S1:** Demographics details of PCV patients and normal individuals.

| Disease status | Age | Blood outgrowth endothelial cells (BOECs) | hiPSC-derived retinal pigment epithelial cells (iPSC-RPE cells) | Genotypes                         |                                   |                               |
|----------------|-----|-------------------------------------------|-----------------------------------------------------------------|-----------------------------------|-----------------------------------|-------------------------------|
|                |     |                                           |                                                                 | ARMS2 rs10490924 (risk allele: T) | HTRA1 rs11200638 (risk allele: A) | CFH rs800292 (risk allele: G) |
| PCV            | 71  | ✓                                         | ✓ (2 iPSC clones)                                               | TT                                | AA                                | GA                            |
|                | 86  | ✓                                         |                                                                 | TT                                | AA                                | AA                            |
|                | 73  |                                           | ✓ (2 iPSC clones)                                               | TT                                | AA                                | GA                            |
|                | 71  | ✓                                         |                                                                 | TT                                | AA                                | GG                            |
|                | 71  | ✓                                         |                                                                 | GT                                | GA                                | GA                            |
| Control        | 46  | ✓                                         | ✓ (2 iPSC clones)                                               | GT                                | GA                                | GG                            |
|                | 46  | ✓                                         | ✓ (2 iPSC clones)                                               | GG                                | GG                                | GA                            |
|                | 71  | ✓                                         |                                                                 | GG                                | GG                                | GG                            |
|                | 49  | ✓                                         |                                                                 | GT                                | GA                                | GA                            |
|                | 47  | ✓                                         |                                                                 | GT                                | GA                                | GG                            |
|                | 46  | ✓                                         |                                                                 | GT                                | GA                                | GA                            |

**Supplemental Table S2:** HYAL1 validation in clinical samples.

| Characteristics, N (%) | Plasma of PCV patients (n = 25) | Vitreous humor of PCV patients (n = 17)                                       |
|------------------------|---------------------------------|-------------------------------------------------------------------------------|
| Age*                   | 66.8 (11.5)                     | 69.9 (8.1)                                                                    |
| Age, Male*             | 67.3 (11.9)                     | 71.2 (9)                                                                      |
| Age, Female*           | 65.2 (11.3)                     | 67.7 (6.3)                                                                    |
| Gender, male           | 19 (76)                         | 6 (35.3)                                                                      |
| Gender, female         | 6 (24)                          | 11 (64.7)                                                                     |
| Ethnicity              | Chinese: 25 (100)               | Chinese: 13 (76.4)<br>Malay: 2 (11.8)<br>Indian: 1 (5.9)<br>Filipino: 1 (5.9) |

All values are reported as N (%) where N indicated number of observations.

\*Values are expressed as mean ( $\pm$  standard deviation).

### Supplemental Table S3: Key resources used in this study.

| REAGENT or RESOURCE                                         | SOURCE                   | IDENTIFIER                           |
|-------------------------------------------------------------|--------------------------|--------------------------------------|
| <b>Antibodies</b>                                           |                          |                                      |
| Mouse monoclonal anti-Oct-3/4                               | Santa Cruz               | Cat# sc-5279,<br>RRID:AB_628051      |
| Mouse monoclonal anti-Sox2                                  | R&D systems              | Cat# MAB2018,<br>RRID:AB_358009      |
| Goat polyclonal anti-Nanog                                  | R&D systems              | Cat# AF1997,<br>RRID:AB_355097       |
| Mouse monoclonal anti-AFP                                   | Sigma-Aldrich            | Cat# A8452,<br>RRID:AB_258392        |
| Mouse monoclonal anti- $\beta$ -III-Tubulin                 | Covance                  | MMS-435P,<br>RRID:AB_2313773         |
| Chicken polyclonal anti-Vimentin                            | Merck Millipore          | Cat# AB5733,<br>RRID:AB_11212377     |
| Mouse monoclonal anti-CD31-APC (clone wm59)                 | BioLegend                | Cat# 303116,<br>RRID:AB_1877151      |
| Mouse monoclonal anti-CD144-PE (clone 55-7H1)               | BD Pharmigen             | Cat# 560410,<br>RRID:AB_1645502      |
| Mouse monoclonal anti-CD45-APC (clone 2D1)                  | Invitrogen               | Cat# 17-9459-42,<br>RRID:AB_10718532 |
| Mouse monoclonal anti-CD68-FITC (clone Y1/82 <sup>a</sup> ) | BioLegend                | Cat# 333806,<br>RRID:AB_1089054      |
| Mouse monoclonal anti-CD133-APC (clone 7)                   | BioLegend                | Cat# 372806,<br>RRID:AB_2632882      |
| Rabbit polyclonal anti-HYAL1                                | Thermo Fisher Scientific | PA5-79420,<br>RRID:AB_2746536        |
| Rabbit polyclonal anti-beta-Actin                           | Abcam                    | Cat# ab75186,<br>RRID:AB_1280759     |
| Mouse monoclonal anti-CAV1                                  | Thermo Fisher Scientific | Cat# MA3-600,<br>RRID:AB_779568      |
| Goat polyclonal anti-CDH5                                   | Santa Cruz Biotechnology | Cat# sc-6458,<br>RRID:AB_2077955     |
| <b>Biological samples</b>                                   |                          |                                      |
| PBMC                                                        | This paper               | N/A                                  |
| Plasma                                                      | This paper               | N/A                                  |
| Vitreous humor                                              | This paper               | N/A                                  |
| <b>Chemicals, peptides, and recombinant proteins</b>        |                          |                                      |
| Biotinylated-HABP (versican G1 domain)                      | Amsbio                   | AMS.HKD-BC41                         |
| TRITC-Phalloidin                                            | Merck                    | 90228                                |
| MitoSOX Red                                                 | Thermo Fisher Scientific | M36008                               |
| <b>Critical commercial assays</b>                           |                          |                                      |
| CytoTune-iPS 2.0 Sendai Reprogramming Kit                   | Thermo Fisher Scientific | A16517                               |
| Chromium Single Cell 3' v3 Reagent Kit                      | 10X Genomics             | PN-1000075                           |
| Seahorse XF Cell Mito Stress Test Kit                       | Agilent Technologies     | 103015-100                           |
| VEGF ELISA                                                  | Abcam                    | ab100662                             |
| PEDF ELISA                                                  | Abcam                    | ab213815                             |
| HTRA1 ELISA                                                 | CUSABIO                  | CSB-EL010901HU                       |
| HYAL1 DuoSet ELISA and DuoSet ELISA Ancillary Reagent Kit 2 | R&D Systems              | DY7358 and DY008                     |
| <b>Experimental models: Cell lines</b>                      |                          |                                      |
| Patient-derived BOECs                                       | This paper               | N/A                                  |
| Patient-derived iPSCs                                       | This paper               | N/A                                  |
| iPSC differentiated RPE                                     | This paper               | N/A                                  |

| Oligonucleotides                                            |                             |                                                                                                                                                                                                       |
|-------------------------------------------------------------|-----------------------------|-------------------------------------------------------------------------------------------------------------------------------------------------------------------------------------------------------|
| Non-targeting siRNA (ON-TARGETplus NT#4)                    | Dharmacon                   | D-001810-04-05                                                                                                                                                                                        |
| siRNA pool for HYAL1 (ON-TARGETplus SMARTpool)              | Dharmacon                   | L-010516-00-0005                                                                                                                                                                                      |
| Software and algorithms                                     |                             |                                                                                                                                                                                                       |
| Seurat v 3.2.0                                              | 1                           | <a href="https://satijalab.org/seurat/">https://satijalab.org/seurat/</a>                                                                                                                             |
| clusterProfiler v 3.17.0                                    | 2                           | <a href="https://github.com/YuLab-SMU/clusterProfiler">https://github.com/YuLab-SMU/clusterProfiler</a>                                                                                               |
| ImageJ/Fiji                                                 | 3                           | <a href="https://imagej.net/Fiji/Downloads">https://imagej.net/Fiji/Downloads</a>                                                                                                                     |
| ZEN BLUE                                                    | ZEISS                       | <a href="https://www.zeiss.com/microscopy/int/products/microscope-software/zen.html">https://www.zeiss.com/microscopy/int/products/microscope-software/zen.html</a>                                   |
| FlowJo                                                      | Becton Dickinson            | <a href="https://www.flowjo.com/">https://www.flowjo.com/</a>                                                                                                                                         |
| Quest Graph™ Four Parameter Logistic (4PL) Curve Calculator | AAT Bioquest, Inc           | <a href="https://www.aatbio.com/tools/four-parameter-logistic-4pl-curve-regression-online-calculator">https://www.aatbio.com/tools/four-parameter-logistic-4pl-curve-regression-online-calculator</a> |
| Prism version 9.0.2.                                        | GraphPad                    | <a href="https://www.graphpad.com/scientific-software/prism/">https://www.graphpad.com/scientific-software/prism/</a>                                                                                 |
| Imaris 3.0                                                  | Oxford Instruments          | <a href="https://imaris.oxinst.com/">https://imaris.oxinst.com/</a>                                                                                                                                   |
| Other                                                       |                             |                                                                                                                                                                                                       |
| EVOM2 epithelial voltohmmeter                               | World Precision Instruments | N/A                                                                                                                                                                                                   |
| Synergy H1                                                  | BioTek                      | N/A                                                                                                                                                                                                   |
| Cytation 3                                                  | BioTek                      | N/A                                                                                                                                                                                                   |
| Confocal Airyscan Microscope LSM800                         | ZEISS                       | N/A                                                                                                                                                                                                   |
| CellDiscoverer7                                             | ZEISS                       | N/A                                                                                                                                                                                                   |
| BD LSR Fortessa X-20 cell analyser                          | Becton Dickinson            | N/A                                                                                                                                                                                                   |

## Supplemental Methods

### ***Endothelial tube formation***

Tube formation assay was performed according to manufacturer instructions (Endothelial Cell Tube Formation Assay, Corning). BOECs were seeded onto Matrigel as 20,000 cells per well of a 96-well plate in serum-free EGM-2 medium, and H9 embryonic stem cell line (H9-ESC) and human umbilical vein endothelial cells (HUVEC) were seeded 7,500 cells per well in mTeSR medium (STEMCELL Technologies) and serum-free, heparin-free, EGM-2 medium, respectively. Phase-contrast micrographs (1024 × 1024-pixel) of tubular networks were captured at 2, 4, 6 and 8h using a Nikon Ti-E inverted microscope at 4× magnification and image acquisition was performed using MetaMorph version 7.8 (Molecular Devices). ImageJ was used to crop four different 380 × 380-pixel areas (optical fields) from each original 4× image. Thereafter, tube formation parameters were quantified using Angiogenesis Analyzer on ImageJ.

### ***Fibrin gel bead sprouting assay***

To evaluate the angiogenesis ability of BOECs, fibrin gel bead sprouting assay was performed as per described<sup>4</sup> with modifications. Briefly, BOECs were coated onto Cytodex 3 microcarrier beads (Sigma-Aldrich) at 150 cells/bead with agitation for 4h and allowed to adhere overnight. Coated beads were subsequently suspended in fibrinogen solution at a concentration of 500 beads/mL and clotted with thrombin. Gels were then topped up with heparin-free, EGM-2 with 10% FBS (Gibco). Cells were incubated overnight and observed for sprout formation after 24h. Cells were incubated for 24h and gels containing sprouts were fixed with 4% paraformaldehyde (200 µL/well) overnight at 4°C. Gels in 8-well chamber slides were washed by rinsing twice in 100 µL/well 1×PBS and gentle orbital shaking (agitation) in 1×PBS for 30 min. Permeabilization was performed with agitation in 0.5% Triton X-100 for 20 min and staining with agitation in TRITC-Phalloidin in 1×PBS with 1% BSA for 30 min and 500 ng/ml DAPI for 10 min. Final rinses were performed with agitation in PBS/T (0.1% v/v Tween-20 in 1×PBS) and subsequently in 1×PBS. Stained gels were stored in 1×PBS at 4°C before confocal imaging. Fibrin-embedded BOECs were imaged using an inverted laser scanning confocal microscope (LSM800, Carl Zeiss) using a Plan-Apochromat 20x/0.80 objective lens. Two-channel Z-stack images (AF568 and DAPI) of whole beads were captured using the ZEN software (blue edition, Carl Zeiss). Images of 1024 × 1024-pixel resolution were acquired from 0.6× optical zoom at Z-intervals of 1.11 µm. Approximately 100 – 200 Z-slices were acquired for each bead. For each individual, 2 – 4 of the most well-formed individual filopodia were imaged. Sprouting parameters were quantified using Imaris 3.0 (Oxford Instruments). The number of sprouts per bead, 'Filament Tracer' sprout length and number of filopodia branch points per sprout were measured.

### ***Endothelial phenotyping by flow cytometry***

Cell surface markers were quantified using flow cytometry to phenotypically confirm the endothelial identity of the derived BOECs. CD31 and CD144 were selected as endothelial markers; CD45 and CD68 as leukocyte exclusion markers, and CD133 as a progenitor marker. Briefly, the BOEC monolayers were trypsinised and washed with DPBS prior to staining with the marker antibodies in the dark for 15 min, room temperature. Fluorescence data were collected on a BD LSR Fortessa X-20 cell analyser (Becton Dickinson) and analyzed using FlowJo software (Becton Dickinson). Gating strategy for FSC/SSC plots and positive/ negative staining have been presented in Supplemental Information.

### ***Immunostaining***

Cells were fixed with 4% Paraformaldehyde Phosphate (09154-85, Nacalai Tesque) at room temperature for 20 minutes, then washed with DPBS without Ca and Mg (SH3002803, Hyclone) and stored at 4°C. Before staining, cells were permeabilized with 0.2% Triton X-100 (Sigma) and blocked with blocking buffer (4% FBS in DPBS) for 60 minutes. Cells were then incubated overnight at 4°C with primary antibodies (Supplemental Table S3) diluted in blocking buffer. Next day, cells were washed three times with wash buffer (TBS + 0.05% Tween20 in water) before incubating with secondary antibodies diluted in blocking buffer for 1 hour at room temperature. Cells were then washed three times with wash buffer followed by keeping in Hoechst dye (1:10000 in PBS). Immunocytochemistry was analyzed using an Olympus IX71 inverted fluorescence microscope fitted with an Olympus digital camera.

### ***Functional characterization of iPSC-RPE cells***

RPE cells were seeded at a density of  $1.07 \times 10^5$  cells/cm<sup>2</sup> in 24well or 6well Transwells (0.4µm pores; Corning) which are coated with 1X Matrigel (Corning). Media had been changed twice per week until cells were confluent. Then an EVOM2 (World Precision Instruments; Sarasota, FL, USA) epithelial voltohmmeter, was used to detect cell–cell resistance every 7 days for continuous 8 weeks. TEER values were subtracted by background resistance and corrected with the culture-insert differences.

iPS-differentiated RPE cells were seeded at a density of  $5 \times 10^5$  cells/well in 24mm diameter polyester inserts (0.4µm pores; 3450, Corning) which are coated with 1X Matrigel (Corning). Cells had been cultured for 2-3 months with media changes (XVIVO 10, Lonza) twice per week. Conditioned Medium was collected from both apical and basal chambers 24 hours after feeding cells. ELISA for vascular endothelial growth factor (VEGF; ab100662, abcam), pigment epithelium-derived factor (PEDF; ab213815, abcam), and HtrA Serine Peptidase 1 (HTRA1, CSB-EL010901HU, CUSABIO) were conducted according to the manufacturer's protocols. Growth factor concentrations were calculated from standard curves and corrected with chamber volumes.

### ***MitoSOX assay***

BOECs treated to 24h of flow or static conditions on glass-bottom wells were stained with MitoSOX Red mitochondrial superoxide indicator according to manufacturer instructions (Cat. no. M36008, Thermo Fisher Scientific). MitoSOX Red-stained cells were fixed with 4% PFA for 15 min and nuclei were stained with DAPI for 10 min. Cells were imaged using a confocal microscopy with a Plan-Apochromat 20x/0.80 objective lens. Z-stacks of 2987 × 2987-pixel resolution were acquired from 1.0× optical zoom at Z-intervals of 1.25 μm. Cells were imaged at the center and the periphery of wells with 3 – 5 representative images captured for each region. Prior to image analysis, image stacks were split into single-channel images and Z-projected with maximum intensity projection using ImageJ. Image analysis was then performed using CellProfiler (version 4.0, Broad Institute) <sup>5</sup> with an optimized pipeline to identify whole cells using both nuclei and MitoSOX Red staining followed by measurements of integrated intensity per cell.

### ***Mitochondrial function assay by Seahorse analyzer***

BOECs were reseeded onto collagen-I-coated 96-well Seahorse microplates at 20,000 cells per well and incubated in a humidified incubator at 37°C, 5% CO<sub>2</sub> for 5h. Thereafter, they were prepared and assayed for mitochondrial function assessment according to manufacturer instructions (Seahorse XF Cell Mito Stress Test Kit, Agilent Technologies). The drugs oligomycin, carbonyl cyanide-4 (trifluoromethoxy) phenylhydrazone (FCCP) and rotenone/ antimycin A (Rot/AA) were used in the assay at concentrations of 1 μM, 1.5 μM and 0.5 μM respectively. To obtain post-assay cell counts for normalization, assayed cells were rinsed once with 1×DPBS, fixed with 4% PFA, stained with DAPI (500ng/ml) for 10 min and counted automatically using an imaging reader with the Gen5 software (Cytation 3, BioTek Instruments). Thereafter, OCR values were normalized to these counts in individual wells, processed and analyzed in Wave 2.6.1 software according to manufacturer instructions (Agilent Technologies). Wells containing uneven cell distribution or displaying outlier OCR were excluded from analysis.

### ***Western Blot***

Cell lysates were prepared by lysing PBS-rinsed cell layers with 150μl of 1X LDS buffer (NuPAGE, Thermo Fisher Scientific) at 4°C for 10mins with gentle rocking. Lysates were harvested and heated at 95°C for 10mins before being resolved in 10% SDS polyacrylamide gels (Bio-Rad). Resolved proteins were then transferred onto nitrocellulose membranes using TransBlot Turbo System (Bio-Rad) and membranes were then blocked with 5% bovine serum albumin (BSA, Hyclone), tris-buffered saline with Tween-20 (TBST) solution. Blots were probed with primary antibodies diluted according to manufacturer's recommended concentrations in 1% BSA/TBST overnight at 4°C with constant agitation. Blots were then washed 4 times with TBST and incubated with secondary antibodies (1:5000, 1%BSA/TBST) for 1h at room temperature. Washing steps were repeated as with primary antibodies (Supplemental Table S3) and development was achieved using Clarity Western ECL



substrate (Bio-rad) incubated for 5mins with agitation at room temperature. Chemiluminescent signals were captured using Gel Doc XR+ (Bio-rad) and band intensities were analysed using Image Lab (Bio-rad) software. Uncropped scans of Western blots can be found in Supplemental Information.

### **ELISA**

Plasma samples were isolated and stored at -80°C after density gradient centrifugation of peripheral blood samples as mentioned under Derivation of BOECs and cell culture. Cell-free BOEC supernatant were harvested and frozen at -80°C after centrifuging at 13,000g for 10 minutes after supernatant were collected following Orbital flow setup above. Vitreous humor samples were given by Singapore National Eye Center. HYAL-1 was quantified using Human Hyaluronidase 1/HYAL1 DuoSet ELISA and DuoSet ELISA Ancillary Reagent Kit 2 (DY7358 and DY008 respectively from R&D Systems), in accordance with the manufacturer's protocol. All plates were read by spectrophotometry at 450nm, followed by a subtraction at 540nm for optical correction using Synergy H1 (BioTek). HYAL-1 concentrations were determined from standard curves generated from four-parameter logistic (4-PL) curve fit ("Quest Graph™ Four Parameter Logistic (4PL) Curve Calculator." AAT Bioquest, Inc) and multiplied by the dilution factor. Mann-whitney test was selected to identify significantly different HYAL-1 levels across plasma, vitreous humor and BOEC supernatant samples in both PCV and normal samples. The level of statistical significance was set at  $p$  value <0.05 and all statistical analysis was performed using GraphPad Prism software, version 9.0.2.



## Original Data

### Uncropped scans of western blots for Figure 5a

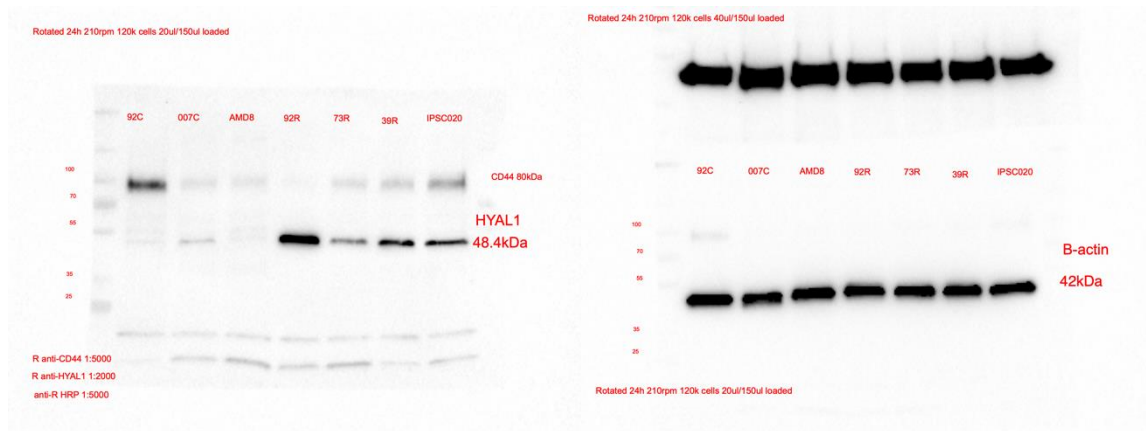

### Uncropped scans of western blots for Figure 6a

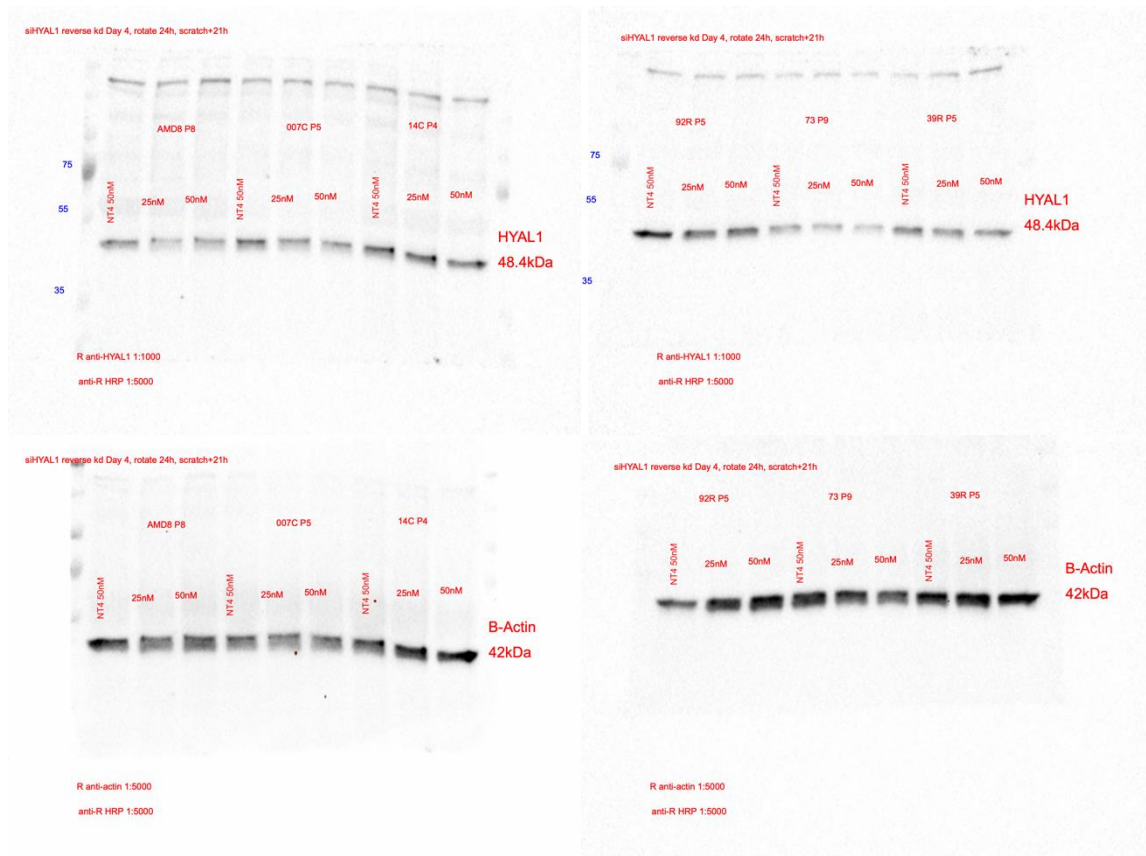

## References

- 1 Stuart, T. *et al.* Comprehensive Integration of Single-Cell Data. *Cell* **177**, 1888-1902 e1821, doi:10.1016/j.cell.2019.05.031 (2019).
- 2 Yu, G., Wang, L. G., Han, Y. & He, Q. Y. clusterProfiler: an R package for comparing biological themes among gene clusters. *OMICS* **16**, 284-287, doi:10.1089/omi.2011.0118 (2012).
- 3 Schindelin, J. *et al.* Fiji: an open-source platform for biological-image analysis. *Nat Methods* **9**, 676-682, doi:10.1038/nmeth.2019 (2012).
- 4 Nakatsu, M. N., Davis, J. & Hughes, C. C. Optimized fibrin gel bead assay for the study of angiogenesis. *J Vis Exp*, 186, doi:10.3791/186 (2007).
- 5 McQuin, C. *et al.* CellProfiler 3.0: Next-generation image processing for biology. *PLOS Biology* **16**, e2005970, doi:10.1371/journal.pbio.2005970 (2018).
